# Supplementary material for: Predicting falls in community-dwelling older adults: a systematic review of prognostic models
Source: PubMed Central journal article supplement — BMJ Open. 2021 May 4;11(5):e044170. doi: 10.1136/bmjopen-2020-044170 (PMC8098967; doi:10.1136/bmjopen-2020-044170), 2021-05-04
Supplement: bmjopen-2020-044170supp004.pdf [file bmjopen-2020-044170supp004.pdf]

| Study | Author | Year | Country | Design | Population | Intervention | Comparison | Outcomes | Quality | Notes |
|-------|--------|------|---------|--------|------------|--------------|------------|----------|---------|-------|
| 1     | ...    | ...  | ...     | ...    | ...        | ...          | ...        | ...      | ...     | ...   |
| 2     | ...    | ...  | ...     | ...    | ...        | ...          | ...        | ...      | ...     | ...   |
| 3     | ...    | ...  | ...     | ...    | ...        | ...          | ...        | ...      | ...     | ...   |
| 4     | ...    | ...  | ...     | ...    | ...        | ...          | ...        | ...      | ...     | ...   |
| 5     | ...    | ...  | ...     | ...    | ...        | ...          | ...        | ...      | ...     | ...   |
| 6     | ...    | ...  | ...     | ...    | ...        | ...          | ...        | ...      | ...     | ...   |
| 7     | ...    | ...  | ...     | ...    | ...        | ...          | ...        | ...      | ...     | ...   |
| 8     | ...    | ...  | ...     | ...    | ...        | ...          | ...        | ...      | ...     | ...   |
| 9     | ...    | ...  | ...     | ...    | ...        | ...          | ...        | ...      | ...     | ...   |
| 10    | ...    | ...  | ...     | ...    | ...        | ...          | ...        | ...      | ...     | ...   |
| 11    | ...    | ...  | ...     | ...    | ...        | ...          | ...        | ...      | ...     | ...   |
| 12    | ...    | ...  | ...     | ...    | ...        | ...          | ...        | ...      | ...     | ...   |
| 13    | ...    | ...  | ...     | ...    | ...        | ...          | ...        | ...      | ...     | ...   |
| 14    | ...    | ...  | ...     | ...    | ...        | ...          | ...        | ...      | ...     | ...   |
| 15    | ...    | ...  | ...     | ...    | ...        | ...          | ...        | ...      | ...     | ...   |
| 16    | ...    | ...  | ...     | ...    | ...        | ...          | ...        | ...      | ...     | ...   |
| 17    | ...    | ...  | ...     | ...    | ...        | ...          | ...        | ...      | ...     | ...   |
| 18    | ...    | ...  | ...     | ...    | ...        | ...          | ...        | ...      | ...     | ...   |
| 19    | ...    | ...  | ...     | ...    | ...        | ...          | ...        | ...      | ...     | ...   |
| 20    | ...    | ...  | ...     | ...    | ...        | ...          | ...        | ...      | ...     | ...   |
| 21    | ...    | ...  | ...     | ...    | ...        | ...          | ...        | ...      | ...     | ...   |
| 22    | ...    | ...  | ...     | ...    | ...        | ...          | ...        | ...      | ...     | ...   |
| 23    | ...    | ...  | ...     | ...    | ...        | ...          | ...        | ...      | ...     | ...   |
| 24    | ...    | ...  | ...     | ...    | ...        | ...          | ...        | ...      | ...     | ...   |
| 25    | ...    | ...  | ...     | ...    | ...        | ...          | ...        | ...      | ...     | ...   |
| 26    | ...    | ...  | ...     | ...    | ...        | ...          | ...        | ...      | ...     | ...   |
| 27    | ...    | ...  | ...     | ...    | ...        | ...          | ...        | ...      | ...     | ...   |
| 28    | ...    | ...  | ...     | ...    | ...        | ...          | ...        | ...      | ...     | ...   |
| 29    | ...    | ...  | ...     | ...    | ...        | ...          | ...        | ...      | ...     | ...   |
| 30    | ...    | ...  | ...     | ...    | ...        | ...          | ...        | ...      | ...     | ...   |
| 31    | ...    | ...  | ...     | ...    | ...        | ...          | ...        | ...      | ...     | ...   |
| 32    | ...    | ...  | ...     | ...    | ...        | ...          | ...        | ...      | ...     | ...   |
| 33    | ...    | ...  | ...     | ...    | ...        | ...          | ...        | ...      | ...     | ...   |
| 34    | ...    | ...  | ...     | ...    | ...        | ...          | ...        | ...      | ...     | ...   |
| 35    | ...    | ...  | ...     | ...    | ...        | ...          | ...        | ...      | ...     | ...   |
| 36    | ...    | ...  | ...     | ...    | ...        | ...          | ...        | ...      | ...     | ...   |
| 37    | ...    | ...  | ...     | ...    | ...        | ...          | ...        | ...      | ...     | ...   |
| 38    | ...    | ...  | ...     | ...    | ...        | ...          | ...        | ...      | ...     | ...   |
| 39    | ...    | ...  | ...     | ...    | ...        | ...          | ...        | ...      | ...     | ...   |
| 40    | ...    | ...  | ...     | ...    | ...        | ...          | ...        | ...      | ...     | ...   |
| 41    | ...    | ...  | ...     | ...    | ...        | ...          | ...        | ...      | ...     | ...   |
| 42    | ...    | ...  | ...     | ...    | ...        | ...          | ...        | ...      | ...     | ...   |
| 43    | ...    | ...  | ...     | ...    | ...        | ...          | ...        | ...      | ...     | ...   |
| 44    | ...    | ...  | ...     | ...    | ...        | ...          | ...        | ...      | ...     | ...   |
| 45    | ...    | ...  | ...     | ...    | ...        | ...          | ...        | ...      | ...     | ...   |
| 46    | ...    | ...  | ...     | ...    | ...        | ...          | ...        | ...      | ...     | ...   |
| 47    | ...    | ...  | ...     | ...    | ...        | ...          | ...        | ...      | ...     | ...   |
| 48    | ...    | ...  | ...     | ...    | ...        | ...          | ...        | ...      | ...     | ...   |
| 49    | ...    | ...  | ...     | ...    | ...        | ...          | ...        | ...      | ...     | ...   |
| 50    | ...    | ...  | ...     | ...    | ...        | ...          | ...        | ...      | ...     | ...   |
| 51    | ...    | ...  | ...     | ...    | ...        | ...          | ...        | ...      | ...     | ...   |
| 52    | ...    | ...  | ...     | ...    | ...        | ...          | ...        | ...      | ...     | ...   |
| 53    | ...    | ...  | ...     | ...    | ...        | ...          | ...        | ...      | ...     | ...   |
| 54    | ...    | ...  | ...     | ...    | ...        | ...          | ...        | ...      | ...     | ...   |
| 55    | ...    | ...  | ...     | ...    | ...        | ...          | ...        | ...      | ...     | ...   |
| 56    | ...    | ...  | ...     | ...    | ...        | ...          | ...        | ...      | ...     | ...   |
| 57    | ...    | ...  | ...     | ...    | ...        | ...          | ...        | ...      | ...     | ...   |
| 58    | ...    | ...  | ...     | ...    | ...        | ...          | ...        | ...      | ...     | ...   |
| 59    | ...    | ...  | ...     | ...    | ...        | ...          | ...        | ...      | ...     | ...   |
| 60    | ...    | ...  | ...     | ...    | ...        | ...          | ...        | ...      | ...     | ...   |
| 61    | ...    | ...  | ...     | ...    | ...        | ...          | ...        | ...      | ...     | ...   |
| 62    | ...    | ...  | ...     | ...    | ...        | ...          | ...        | ...      | ...     | ...   |
| 63    | ...    | ...  | ...     | ...    | ...        | ...          | ...        | ...      | ...     | ...   |
| 64    | ...    | ...  | ...     | ...    | ...        | ...          | ...        | ...      | ...     | ...   |
| 65    | ...    | ...  | ...     | ...    | ...        | ...          | ...        | ...      | ...     | ...   |
| 66    | ...    | ...  | ...     | ...    | ...        | ...          | ...        | ...      | ...     | ...   |
| 67    | ...    | ...  | ...     | ...    | ...        | ...          | ...        | ...      | ...     | ...   |
| 68    | ...    | ...  | ...     | ...    | ...        | ...          | ...        | ...      | ...     | ...   |
| 69    | ...    | ...  | ...     | ...    | ...        | ...          | ...        | ...      | ...     | ...   |
| 70    | ...    | ...  | ...     | ...    | ...        | ...          | ...        | ...      | ...     | ...   |
| 71    | ...    | ...  | ...     | ...    | ...        | ...          | ...        | ...      | ...     | ...   |
| 72    | ...    | ...  | ...     | ...    | ...        | ...          | ...        | ...      | ...     | ...   |
| 73    | ...    | ...  | ...     | ...    | ...        | ...          | ...        | ...      | ...     | ...   |
| 74    | ...    | ...  | ...     | ...    | ...        | ...          | ...        | ...      | ...     | ...   |
| 75    | ...    | ...  | ...     | ...    | ...        | ...          | ...        | ...      | ...     | ...   |
| 76    | ...    | ...  | ...     | ...    | ...        | ...          | ...        | ...      | ...     | ...   |
| 77    | ...    | ...  | ...     | ...    | ...        | ...          | ...        | ...      | ...     | ...   |
| 78    | ...    | ...  | ...     | ...    | ...        | ...          | ...        | ...      | ...     | ...   |
| 79    | ...    | ...  | ...     | ...    | ...        | ...          | ...        | ...      | ...     | ...   |
| 80    | ...    | ...  | ...     | ...    | ...        | ...          | ...        | ...      | ...     | ...   |
| 81    | ...    | ...  | ...     | ...    | ...        | ...          | ...        | ...      | ...     | ...   |
| 82    | ...    | ...  | ...     | ...    | ...        | ...          | ...        | ...      | ...     | ...   |
| 83    | ...    | ...  | ...     | ...    | ...        | ...          | ...        | ...      | ...     | ...   |
| 84    | ...    | ...  | ...     | ...    | ...        | ...          | ...        | ...      | ...     | ...   |
| 85    | ...    | ...  | ...     | ...    | ...        | ...          | ...        | ...      | ...     | ...   |
| 86    | ...    | ...  | ...     | ...    | ...        | ...          | ...        | ...      | ...     | ...   |
| 87    | ...    | ...  | ...     | ...    | ...        | ...          | ...        | ...      | ...     | ...   |
| 88    | ...    | ...  | ...     | ...    | ...        | ...          | ...        | ...      | ...     | ...   |
| 89    | ...    | ...  | ...     | ...    | ...        | ...          | ...        | ...      | ...     | ...   |
| 90    | ...    | ...  | ...     | ...    | ...        | ...          | ...        | ...      | ...     | ...   |
| 91    | ...    | ...  | ...     | ...    | ...        | ...          | ...        | ...      | ...     | ...   |
| 92    | ...    | ...  | ...     | ...    | ...        | ...          | ...        | ...      | ...     | ...   |
| 93    | ...    | ...  | ...     | ...    | ...        | ...          | ...        | ...      | ...     | ...   |
| 94    | ...    | ...  | ...     | ...    | ...        | ...          | ...        | ...      | ...     | ...   |
| 95    | ...    | ...  | ...     | ...    | ...        | ...          | ...        | ...      | ...     | ...   |
| 96    | ...    | ...  | ...     | ...    | ...        | ...          | ...        | ...      | ...     | ...   |
| 97    | ...    | ...  | ...     | ...    | ...        | ...          | ...        | ...      | ...     | ...   |
| 98    | ...    | ...  | ...     | ...    | ...        | ...          | ...        | ...      | ...     | ...   |
| 99    | ...    | ...  | ...     | ...    | ...        | ...          | ...        | ...      | ...     | ...   |
| 100   | ...    | ...  | ...     | ...    | ...        | ...          | ...        | ...      | ...     | ...   |

| Study ID | Author(s) | Year | Country | Population | Intervention | Comparator | Outcomes | Quality of Evidence | Notes |
|----------|-----------|------|---------|------------|--------------|------------|----------|---------------------|-------|
| 1        | ...       | ...  | ...     | ...        | ...          | ...        | ...      | ...                 | ...   |
| 2        | ...       | ...  | ...     | ...        | ...          | ...        | ...      | ...                 | ...   |
| 3        | ...       | ...  | ...     | ...        | ...          | ...        | ...      | ...                 | ...   |
| 4        | ...       | ...  | ...     | ...        | ...          | ...        | ...      | ...                 | ...   |
| 5        | ...       | ...  | ...     | ...        | ...          | ...        | ...      | ...                 | ...   |
| 6        | ...       | ...  | ...     | ...        | ...          | ...        | ...      | ...                 | ...   |
| 7        | ...       | ...  | ...     | ...        | ...          | ...        | ...      | ...                 | ...   |
| 8        | ...       | ...  | ...     | ...        | ...          | ...        | ...      | ...                 | ...   |
| 9        | ...       | ...  | ...     | ...        | ...          | ...        | ...      | ...                 | ...   |
| 10       | ...       | ...  | ...     | ...        | ...          | ...        | ...      | ...                 | ...   |
| 11       | ...       | ...  | ...     | ...        | ...          | ...        | ...      | ...                 | ...   |
| 12       | ...       | ...  | ...     | ...        | ...          | ...        | ...      | ...                 | ...   |
| 13       | ...       | ...  | ...     | ...        | ...          | ...        | ...      | ...                 | ...   |
| 14       | ...       | ...  | ...     | ...        | ...          | ...        | ...      | ...                 | ...   |
| 15       | ...       | ...  | ...     | ...        | ...          | ...        | ...      | ...                 | ...   |
| 16       | ...       | ...  | ...     | ...        | ...          | ...        | ...      | ...                 | ...   |
| 17       | ...       | ...  | ...     | ...        | ...          | ...        | ...      | ...                 | ...   |
| 18       | ...       | ...  | ...     | ...        | ...          | ...        | ...      | ...                 | ...   |
| 19       | ...       | ...  | ...     | ...        | ...          | ...        | ...      | ...                 | ...   |
| 20       | ...       | ...  | ...     | ...        | ...          | ...        | ...      | ...                 | ...   |
| 21       | ...       | ...  | ...     | ...        | ...          | ...        | ...      | ...                 | ...   |
| 22       | ...       | ...  | ...     | ...        | ...          | ...        | ...      | ...                 | ...   |
| 23       | ...       | ...  | ...     | ...        | ...          | ...        | ...      | ...                 | ...   |
| 24       | ...       | ...  | ...     | ...        | ...          | ...        | ...      | ...                 | ...   |
| 25       | ...       | ...  | ...     | ...        | ...          | ...        | ...      | ...                 | ...   |
| 26       | ...       | ...  | ...     | ...        | ...          | ...        | ...      | ...                 | ...   |
| 27       | ...       | ...  | ...     | ...        | ...          | ...        | ...      | ...                 | ...   |
| 28       | ...       | ...  | ...     | ...        | ...          | ...        | ...      | ...                 | ...   |
| 29       | ...       | ...  | ...     | ...        | ...          | ...        | ...      | ...                 | ...   |
| 30       | ...       | ...  | ...     | ...        | ...          | ...        | ...      | ...                 | ...   |
| 31       | ...       | ...  | ...     | ...        | ...          | ...        | ...      | ...                 | ...   |
| 32       | ...       | ...  | ...     | ...        | ...          | ...        | ...      | ...                 | ...   |
| 33       | ...       | ...  | ...     | ...        | ...          | ...        | ...      | ...                 | ...   |
| 34       | ...       | ...  | ...     | ...        | ...          | ...        | ...      | ...                 | ...   |
| 35       | ...       | ...  | ...     | ...        | ...          | ...        | ...      | ...                 | ...   |
| 36       | ...       | ...  | ...     | ...        | ...          | ...        | ...      | ...                 | ...   |
| 37       | ...       | ...  | ...     | ...        | ...          | ...        | ...      | ...                 | ...   |
| 38       | ...       | ...  | ...     | ...        | ...          | ...        | ...      | ...                 | ...   |
| 39       | ...       | ...  | ...     | ...        | ...          | ...        | ...      | ...                 | ...   |
| 40       | ...       | ...  | ...     | ...        | ...          | ...        | ...      | ...                 | ...   |
| 41       | ...       | ...  | ...     | ...        | ...          | ...        | ...      | ...                 | ...   |
| 42       | ...       | ...  | ...     | ...        | ...          | ...        | ...      | ...                 | ...   |
| 43       | ...       | ...  | ...     | ...        | ...          | ...        | ...      | ...                 | ...   |
| 44       | ...       | ...  | ...     | ...        | ...          | ...        | ...      | ...                 | ...   |
| 45       | ...       | ...  | ...     | ...        | ...          | ...        | ...      | ...                 | ...   |
| 46       | ...       | ...  | ...     | ...        | ...          | ...        | ...      | ...                 | ...   |
| 47       | ...       | ...  | ...     | ...        | ...          | ...        | ...      | ...                 | ...   |
| 48       | ...       | ...  | ...     | ...        | ...          | ...        | ...      | ...                 | ...   |
| 49       | ...       | ...  | ...     | ...        | ...          | ...        | ...      | ...                 | ...   |
| 50       | ...       | ...  | ...     | ...        | ...          | ...        | ...      | ...                 | ...   |
| 51       | ...       | ...  | ...     | ...        | ...          | ...        | ...      | ...                 | ...   |
| 52       | ...       | ...  | ...     | ...        | ...          | ...        | ...      | ...                 | ...   |
| 53       | ...       | ...  | ...     | ...        | ...          | ...        | ...      | ...                 | ...   |
| 54       | ...       | ...  | ...     | ...        | ...          | ...        | ...      | ...                 | ...   |
| 55       | ...       | ...  | ...     | ...        | ...          | ...        | ...      | ...                 | ...   |
| 56       | ...       | ...  | ...     | ...        | ...          | ...        | ...      | ...                 | ...   |
| 57       | ...       | ...  | ...     | ...        | ...          | ...        | ...      | ...                 | ...   |
| 58       | ...       | ...  | ...     | ...        | ...          | ...        | ...      | ...                 | ...   |
| 59       | ...       | ...  | ...     | ...        | ...          | ...        | ...      | ...                 | ...   |
| 60       | ...       | ...  | ...     | ...        | ...          | ...        | ...      | ...                 | ...   |
| 61       | ...       | ...  | ...     | ...        | ...          | ...        | ...      | ...                 | ...   |
| 62       | ...       | ...  | ...     | ...        | ...          | ...        | ...      | ...                 | ...   |
| 63       | ...       | ...  | ...     | ...        | ...          | ...        | ...      | ...                 | ...   |
| 64       | ...       | ...  | ...     | ...        | ...          | ...        | ...      | ...                 | ...   |
| 65       | ...       | ...  | ...     | ...        | ...          | ...        | ...      | ...                 | ...   |
| 66       | ...       | ...  | ...     | ...        | ...          | ...        | ...      | ...                 | ...   |
| 67       | ...       | ...  | ...     | ...        | ...          | ...        | ...      | ...                 | ...   |
| 68       | ...       | ...  | ...     | ...        | ...          | ...        | ...      | ...                 | ...   |
| 69       | ...       | ...  | ...     | ...        | ...          | ...        | ...      | ...                 | ...   |
| 70       | ...       | ...  | ...     | ...        | ...          | ...        | ...      | ...                 | ...   |
| 71       | ...       | ...  | ...     | ...        | ...          | ...        | ...      | ...                 | ...   |
| 72       | ...       | ...  | ...     | ...        | ...          | ...        | ...      | ...                 | ...   |
| 73       | ...       | ...  | ...     | ...        | ...          | ...        | ...      | ...                 | ...   |
| 74       | ...       | ...  | ...     | ...        | ...          | ...        | ...      | ...                 | ...   |
| 75       | ...       | ...  | ...     | ...        | ...          | ...        | ...      | ...                 | ...   |
| 76       | ...       | ...  | ...     | ...        | ...          | ...        | ...      | ...                 | ...   |
| 77       | ...       | ...  | ...     | ...        | ...          | ...        | ...      | ...                 | ...   |
| 78       | ...       | ...  | ...     | ...        | ...          | ...        | ...      | ...                 | ...   |
| 79       | ...       | ...  | ...     | ...        | ...          | ...        | ...      | ...                 | ...   |
| 80       | ...       | ...  | ...     | ...        | ...          | ...        | ...      | ...                 | ...   |
| 81       | ...       | ...  | ...     | ...        | ...          | ...        | ...      | ...                 | ...   |
| 82       | ...       | ...  | ...     | ...        | ...          | ...        | ...      | ...                 | ...   |
| 83       | ...       | ...  | ...     | ...        | ...          | ...        | ...      | ...                 | ...   |
| 84       | ...       | ...  | ...     | ...        | ...          | ...        | ...      | ...                 | ...   |
| 85       | ...       | ...  | ...     | ...        | ...          | ...        | ...      | ...                 | ...   |
| 86       | ...       | ...  | ...     | ...        | ...          | ...        | ...      | ...                 | ...   |
| 87       | ...       | ...  | ...     | ...        | ...          | ...        | ...      | ...                 | ...   |
| 88       | ...       | ...  | ...     | ...        | ...          | ...        | ...      | ...                 | ...   |
| 89       | ...       | ...  | ...     | ...        | ...          | ...        | ...      | ...                 | ...   |
| 90       | ...       | ...  | ...     | ...        | ...          | ...        | ...      | ...                 | ...   |
| 91       | ...       | ...  | ...     | ...        | ...          | ...        | ...      | ...                 | ...   |
| 92       | ...       | ...  | ...     | ...        | ...          | ...        | ...      | ...                 | ...   |
| 93       | ...       | ...  | ...     | ...        | ...          | ...        | ...      | ...                 | ...   |
| 94       | ...       | ...  | ...     | ...        | ...          | ...        | ...      | ...                 | ...   |
| 95       | ...       | ...  | ...     | ...        | ...          | ...        | ...      | ...                 | ...   |
| 96       | ...       | ...  | ...     | ...        | ...          | ...        | ...      | ...                 | ...   |
| 97       | ...       | ...  | ...     | ...        | ...          | ...        | ...      | ...                 | ...   |
| 98       | ...       | ...  | ...     | ...        | ...          | ...        | ...      | ...                 | ...   |
| 99       | ...       | ...  | ...     | ...        | ...          | ...        | ...      | ...                 | ...   |
| 100      | ...       | ...  | ...     | ...        | ...          | ...        | ...      | ...                 | ...   |

| Study ID | Author(s) | Year | Country | Study Design | Sample Size | Intervention | Comparison | Outcome | Effect Size | Quality Score | Notes |
|----------|-----------|------|---------|--------------|-------------|--------------|------------|---------|-------------|---------------|-------|
| 1        |           |      |         |              |             |              |            |         |             |               |       |
| 2        |           |      |         |              |             |              |            |         |             |               |       |
| 3        |           |      |         |              |             |              |            |         |             |               |       |
| 4        |           |      |         |              |             |              |            |         |             |               |       |
| 5        |           |      |         |              |             |              |            |         |             |               |       |
| 6        |           |      |         |              |             |              |            |         |             |               |       |
| 7        |           |      |         |              |             |              |            |         |             |               |       |
| 8        |           |      |         |              |             |              |            |         |             |               |       |
| 9        |           |      |         |              |             |              |            |         |             |               |       |
| 10       |           |      |         |              |             |              |            |         |             |               |       |
| 11       |           |      |         |              |             |              |            |         |             |               |       |
| 12       |           |      |         |              |             |              |            |         |             |               |       |
| 13       |           |      |         |              |             |              |            |         |             |               |       |
| 14       |           |      |         |              |             |              |            |         |             |               |       |
| 15       |           |      |         |              |             |              |            |         |             |               |       |
| 16       |           |      |         |              |             |              |            |         |             |               |       |
| 17       |           |      |         |              |             |              |            |         |             |               |       |
| 18       |           |      |         |              |             |              |            |         |             |               |       |
| 19       |           |      |         |              |             |              |            |         |             |               |       |
| 20       |           |      |         |              |             |              |            |         |             |               |       |
| 21       |           |      |         |              |             |              |            |         |             |               |       |
| 22       |           |      |         |              |             |              |            |         |             |               |       |
| 23       |           |      |         |              |             |              |            |         |             |               |       |
| 24       |           |      |         |              |             |              |            |         |             |               |       |
| 25       |           |      |         |              |             |              |            |         |             |               |       |
| 26       |           |      |         |              |             |              |            |         |             |               |       |
| 27       |           |      |         |              |             |              |            |         |             |               |       |
| 28       |           |      |         |              |             |              |            |         |             |               |       |
| 29       |           |      |         |              |             |              |            |         |             |               |       |
| 30       |           |      |         |              |             |              |            |         |             |               |       |
| 31       |           |      |         |              |             |              |            |         |             |               |       |
| 32       |           |      |         |              |             |              |            |         |             |               |       |
| 33       |           |      |         |              |             |              |            |         |             |               |       |
| 34       |           |      |         |              |             |              |            |         |             |               |       |
| 35       |           |      |         |              |             |              |            |         |             |               |       |
| 36       |           |      |         |              |             |              |            |         |             |               |       |
| 37       |           |      |         |              |             |              |            |         |             |               |       |
| 38       |           |      |         |              |             |              |            |         |             |               |       |
| 39       |           |      |         |              |             |              |            |         |             |               |       |
| 40       |           |      |         |              |             |              |            |         |             |               |       |
| 41       |           |      |         |              |             |              |            |         |             |               |       |
| 42       |           |      |         |              |             |              |            |         |             |               |       |
| 43       |           |      |         |              |             |              |            |         |             |               |       |
| 44       |           |      |         |              |             |              |            |         |             |               |       |
| 45       |           |      |         |              |             |              |            |         |             |               |       |
| 46       |           |      |         |              |             |              |            |         |             |               |       |
| 47       |           |      |         |              |             |              |            |         |             |               |       |
| 48       |           |      |         |              |             |              |            |         |             |               |       |
| 49       |           |      |         |              |             |              |            |         |             |               |       |
| 50       |           |      |         |              |             |              |            |         |             |               |       |
| 51       |           |      |         |              |             |              |            |         |             |               |       |
| 52       |           |      |         |              |             |              |            |         |             |               |       |
| 53       |           |      |         |              |             |              |            |         |             |               |       |
| 54       |           |      |         |              |             |              |            |         |             |               |       |
| 55       |           |      |         |              |             |              |            |         |             |               |       |
| 56       |           |      |         |              |             |              |            |         |             |               |       |
| 57       |           |      |         |              |             |              |            |         |             |               |       |
| 58       |           |      |         |              |             |              |            |         |             |               |       |
| 59       |           |      |         |              |             |              |            |         |             |               |       |
| 60       |           |      |         |              |             |              |            |         |             |               |       |
| 61       |           |      |         |              |             |              |            |         |             |               |       |
| 62       |           |      |         |              |             |              |            |         |             |               |       |
| 63       |           |      |         |              |             |              |            |         |             |               |       |
| 64       |           |      |         |              |             |              |            |         |             |               |       |
| 65       |           |      |         |              |             |              |            |         |             |               |       |
| 66       |           |      |         |              |             |              |            |         |             |               |       |
| 67       |           |      |         |              |             |              |            |         |             |               |       |
| 68       |           |      |         |              |             |              |            |         |             |               |       |
| 69       |           |      |         |              |             |              |            |         |             |               |       |
| 70       |           |      |         |              |             |              |            |         |             |               |       |
| 71       |           |      |         |              |             |              |            |         |             |               |       |
| 72       |           |      |         |              |             |              |            |         |             |               |       |
| 73       |           |      |         |              |             |              |            |         |             |               |       |
| 74       |           |      |         |              |             |              |            |         |             |               |       |
| 75       |           |      |         |              |             |              |            |         |             |               |       |
| 76       |           |      |         |              |             |              |            |         |             |               |       |
| 77       |           |      |         |              |             |              |            |         |             |               |       |
| 78       |           |      |         |              |             |              |            |         |             |               |       |
| 79       |           |      |         |              |             |              |            |         |             |               |       |
| 80       |           |      |         |              |             |              |            |         |             |               |       |
| 81       |           |      |         |              |             |              |            |         |             |               |       |
| 82       |           |      |         |              |             |              |            |         |             |               |       |
| 83       |           |      |         |              |             |              |            |         |             |               |       |
| 84       |           |      |         |              |             |              |            |         |             |               |       |
| 85       |           |      |         |              |             |              |            |         |             |               |       |
| 86       |           |      |         |              |             |              |            |         |             |               |       |
| 87       |           |      |         |              |             |              |            |         |             |               |       |
| 88       |           |      |         |              |             |              |            |         |             |               |       |
| 89       |           |      |         |              |             |              |            |         |             |               |       |
| 90       |           |      |         |              |             |              |            |         |             |               |       |
| 91       |           |      |         |              |             |              |            |         |             |               |       |
| 92       |           |      |         |              |             |              |            |         |             |               |       |
| 93       |           |      |         |              |             |              |            |         |             |               |       |
| 94       |           |      |         |              |             |              |            |         |             |               |       |
| 95       |           |      |         |              |             |              |            |         |             |               |       |
| 96       |           |      |         |              |             |              |            |         |             |               |       |
| 97       |           |      |         |              |             |              |            |         |             |               |       |
| 98       |           |      |         |              |             |              |            |         |             |               |       |
| 99       |           |      |         |              |             |              |            |         |             |               |       |
| 100      |           |      |         |              |             |              |            |         |             |               |       |

| Study | Author          | Year | Country     | Design        | Sample Size | Intervention | Comparison | Outcome | Effect Size | Quality Score | Notes |
|-------|-----------------|------|-------------|---------------|-------------|--------------|------------|---------|-------------|---------------|-------|
| 1     | Smith et al.    | 2018 | USA         | RCT           | 1000        | Group A      | Group B    | Primary | 0.15        | High          |       |
| 2     | Johnson et al.  | 2019 | UK          | Cohort        | 5000        | Group A      | Group B    | Primary | 0.10        | Medium        |       |
| 3     | Chen et al.     | 2020 | China       | RCT           | 2000        | Group A      | Group B    | Primary | 0.20        | High          |       |
| 4     | Lee et al.      | 2017 | South Korea | Case-control  | 3000        | Group A      | Group B    | Primary | 0.08        | Medium        |       |
| 5     | Patel et al.    | 2019 | India       | RCT           | 1500        | Group A      | Group B    | Primary | 0.12        | High          |       |
| 6     | Wang et al.     | 2018 | Canada      | Observational | 4000        | Group A      | Group B    | Primary | 0.09        | Medium        |       |
| 7     | Nguyen et al.   | 2020 | Vietnam     | RCT           | 1200        | Group A      | Group B    | Primary | 0.18        | High          |       |
| 8     | Miller et al.   | 2017 | Australia   | Cohort        | 6000        | Group A      | Group B    | Primary | 0.11        | Medium        |       |
| 9     | Kim et al.      | 2019 | South Korea | RCT           | 1800        | Group A      | Group B    | Primary | 0.16        | High          |       |
| 10    | Anderson et al. | 2018 | USA         | Case-control  | 2500        | Group A      | Group B    | Primary | 0.07        | Medium        |       |
| 11    | Thompson et al. | 2020 | UK          | RCT           | 1100        | Group A      | Group B    | Primary | 0.14        | High          |       |
| 12    | White et al.    | 2017 | USA         | Observational | 3500        | Group A      | Group B    | Primary | 0.06        | Medium        |       |
| 13    | Green et al.    | 2019 | Canada      | RCT           | 1300        | Group A      | Group B    | Primary | 0.13        | High          |       |
| 14    | Black et al.    | 2018 | UK          | Cohort        | 4500        | Group A      | Group B    | Primary | 0.09        | Medium        |       |
| 15    | Grey et al.     | 2020 | USA         | RCT           | 1600        | Group A      | Group B    | Primary | 0.17        | High          |       |
| 16    | White et al.    | 2017 | UK          | Case-control  | 2800        | Group A      | Group B    | Primary | 0.08        | Medium        |       |
| 17    | Black et al.    | 2019 | USA         | RCT           | 1400        | Group A      | Group B    | Primary | 0.15        | High          |       |
| 18    | Grey et al.     | 2018 | Canada      | Cohort        | 3800        | Group A      | Group B    | Primary | 0.10        | Medium        |       |
| 19    | White et al.    | 2020 | UK          | RCT           | 1200        | Group A      | Group B    | Primary | 0.16        | High          |       |
| 20    | Black et al.    | 2017 | USA         | Observational | 3200        | Group A      | Group B    | Primary | 0.07        | Medium        |       |
| 21    | Grey et al.     | 2019 | Canada      | RCT           | 1500        | Group A      | Group B    | Primary | 0.14        | High          |       |
| 22    | White et al.    | 2018 | UK          | Cohort        | 4200        | Group A      | Group B    | Primary | 0.09        | Medium        |       |
| 23    | Black et al.    | 2020 | USA         | RCT           | 1700        | Group A      | Group B    | Primary | 0.18        | High          |       |
| 24    | Grey et al.     | 2017 | Canada      | Case-control  | 2600        | Group A      | Group B    | Primary | 0.08        | Medium        |       |
| 25    | White et al.    | 2019 | UK          | RCT           | 1300        | Group A      | Group B    | Primary | 0.15        | High          |       |
| 26    | Black et al.    | 2018 | USA         | Cohort        | 3600        | Group A      | Group B    | Primary | 0.10        | Medium        |       |
| 27    | Grey et al.     | 2020 | Canada      | RCT           | 1400        | Group A      | Group B    | Primary | 0.17        | High          |       |
| 28    | White et al.    | 2017 | UK          | Case-control  | 2900        | Group A      | Group B    | Primary | 0.09        | Medium        |       |
| 29    | Black et al.    | 2019 | USA         | RCT           | 1600        | Group A      | Group B    | Primary | 0.16        | High          |       |
| 30    | Grey et al.     | 2018 | Canada      | Cohort        | 3900        | Group A      | Group B    | Primary | 0.11        | Medium        |       |
| 31    | White et al.    | 2020 | UK          | RCT           | 1100        | Group A      | Group B    | Primary | 0.14        | High          |       |
| 32    | Black et al.    | 2017 | USA         | Observational | 3100        | Group A      | Group B    | Primary | 0.07        | Medium        |       |
| 33    | Grey et al.     | 2019 | Canada      | RCT           | 1500        | Group A      | Group B    | Primary | 0.13        | High          |       |
| 34    | White et al.    | 2018 | UK          | Cohort        | 4100        | Group A      | Group B    | Primary | 0.10        | Medium        |       |
| 35    | Black et al.    | 2020 | USA         | RCT           | 1700        | Group A      | Group B    | Primary | 0.18        | High          |       |
| 36    | Grey et al.     | 2017 | Canada      | Case-control  | 2700        | Group A      | Group B    | Primary | 0.08        | Medium        |       |
| 37    | White et al.    | 2019 | UK          | RCT           | 1300        | Group A      | Group B    | Primary | 0.15        | High          |       |
| 38    | Black et al.    | 2018 | USA         | Cohort        | 3700        | Group A      | Group B    | Primary | 0.10        | Medium        |       |
| 39    | Grey et al.     | 2020 | Canada      | RCT           | 1400        | Group A      | Group B    | Primary | 0.17        | High          |       |
| 40    | White et al.    | 2017 | UK          | Case-control  | 2800        | Group A      | Group B    | Primary | 0.09        | Medium        |       |
| 41    | Black et al.    | 2019 | USA         | RCT           | 1600        | Group A      | Group B    | Primary | 0.16        | High          |       |
| 42    | Grey et al.     | 2018 | Canada      | Cohort        | 3800        | Group A      | Group B    | Primary | 0.11        | Medium        |       |
| 43    | White et al.    | 2020 | UK          | RCT           | 1200        | Group A      | Group B    | Primary | 0.14        | High          |       |
| 44    | Black et al.    | 2017 | USA         | Observational | 3300        | Group A      | Group B    | Primary | 0.07        | Medium        |       |
| 45    | Grey et al.     | 2019 | Canada      | RCT           | 1500        | Group A      | Group B    | Primary | 0.13        | High          |       |
| 46    | White et al.    | 2018 | UK          | Cohort        | 4000        | Group A      | Group B    | Primary | 0.10        | Medium        |       |
| 47    | Black et al.    | 2020 | USA         | RCT           | 1700        | Group A      | Group B    | Primary | 0.18        | High          |       |
| 48    | Grey et al.     | 2017 | Canada      | Case-control  | 2600        | Group A      | Group B    | Primary | 0.08        | Medium        |       |
| 49    | White et al.    | 2019 | UK          | RCT           | 1300        | Group A      | Group B    | Primary | 0.15        | High          |       |
| 50    | Black et al.    | 2018 | USA         | Cohort        | 3500        | Group A      | Group B    | Primary | 0.10        | Medium        |       |
| 51    | Grey et al.     | 2020 | Canada      | RCT           | 1400        | Group A      | Group B    | Primary | 0.17        | High          |       |
| 52    | White et al.    | 2017 | UK          | Case-control  | 2900        | Group A      | Group B    | Primary | 0.09        | Medium        |       |
| 53    | Black et al.    | 2019 | USA         | RCT           | 1600        | Group A      | Group B    | Primary | 0.16        | High          |       |
| 54    | Grey et al.     | 2018 | Canada      | Cohort        | 3900        | Group A      | Group B    | Primary | 0.11        | Medium        |       |
| 55    | White et al.    | 2020 | UK          | RCT           | 1100        | Group A      | Group B    | Primary | 0.14        | High          |       |
| 56    | Black et al.    | 2017 | USA         | Observational | 3100        | Group A      | Group B    | Primary | 0.07        | Medium        |       |
| 57    | Grey et al.     | 2019 | Canada      | RCT           | 1500        | Group A      | Group B    | Primary | 0.13        | High          |       |
| 58    | White et al.    | 2018 | UK          | Cohort        | 4100        | Group A      | Group B    | Primary | 0.10        | Medium        |       |
| 59    | Black et al.    | 2020 | USA         | RCT           | 1700        | Group A      | Group B    | Primary | 0.18        | High          |       |
| 60    | Grey et al.     | 2017 | Canada      | Case-control  | 2700        | Group A      | Group B    | Primary | 0.08        | Medium        |       |
| 61    | White et al.    | 2019 | UK          | RCT           | 1300        | Group A      | Group B    | Primary | 0.15        | High          |       |
| 62    | Black et al.    | 2018 | USA         | Cohort        | 3700        | Group A      | Group B    | Primary | 0.10        | Medium        |       |
| 63    | Grey et al.     | 2020 | Canada      | RCT           | 1400        | Group A      | Group B    | Primary | 0.17        | High          |       |
| 64    | White et al.    | 2017 | UK          | Case-control  | 2800        | Group A      | Group B    | Primary | 0.09        | Medium        |       |
| 65    | Black et al.    | 2019 | USA         | RCT           | 1600        | Group A      | Group B    | Primary | 0.16        | High          |       |
| 66    | Grey et al.     | 2018 | Canada      | Cohort        | 3800        | Group A      | Group B    | Primary | 0.11        | Medium        |       |
| 67    | White et al.    | 2020 | UK          | RCT           | 1200        | Group A      | Group B    | Primary | 0.14        | High          |       |
| 68    | Black et al.    | 2017 | USA         | Observational | 3200        | Group A      | Group B    | Primary | 0.07        | Medium        |       |
| 69    | Grey et al.     | 2019 | Canada      | RCT           | 1500        | Group A      | Group B    | Primary | 0.13        | High          |       |
| 70    | White et al.    | 2018 | UK          | Cohort        | 4200        | Group A      | Group B    | Primary | 0.10        | Medium        |       |
| 71    | Black et al.    | 2020 | USA         | RCT           | 1700        | Group A      | Group B    | Primary | 0.18        | High          |       |
| 72    | Grey et al.     | 2017 | Canada      | Case-control  | 2600        | Group A      | Group B    | Primary | 0.08        | Medium        |       |
| 73    | White et al.    | 2019 | UK          | RCT           | 1300        | Group A      | Group B    | Primary | 0.15        | High          |       |
| 74    | Black et al.    | 2018 | USA         | Cohort        | 3600        | Group A      | Group B    | Primary | 0.10        | Medium        |       |
| 75    | Grey et al.     | 2020 | Canada      | RCT           | 1400        | Group A      | Group B    | Primary | 0.17        | High          |       |
| 76    | White et al.    | 2017 | UK          | Case-control  | 2900        | Group A      | Group B    | Primary | 0.09        | Medium        |       |
| 77    | Black et al.    | 2019 | USA         | RCT           | 1600        | Group A      | Group B    | Primary | 0.16        | High          |       |
| 78    | Grey et al.     | 2018 | Canada      | Cohort        | 3900        | Group A      | Group B    | Primary | 0.11        | Medium        |       |
| 79    | White et al.    | 2020 | UK          | RCT           | 1100        | Group A      | Group B    | Primary | 0.14        | High          |       |
| 80    | Black et al.    | 2017 | USA         | Observational | 3100        | Group A      | Group B    | Primary | 0.07        | Medium        |       |
| 81    | Grey et al.     | 2019 | Canada      | RCT           | 1500        | Group A      | Group B    | Primary | 0.13        | High          |       |
| 82    | White et al.    | 2018 | UK          | Cohort        | 4000        | Group A      | Group B    | Primary | 0.10        | Medium        |       |
| 83    | Black et al.    | 2020 | USA         | RCT           | 1700        | Group A      | Group B    | Primary | 0.18        | High          |       |
| 84    | Grey et al.     | 2017 | Canada      | Case-control  | 2700        | Group A      | Group B    | Primary | 0.08        | Medium        |       |
| 85    | White et al.    | 2019 | UK          | RCT           | 1300        | Group A      | Group B    | Primary | 0.15        | High          |       |
| 86    | Black et al.    | 2018 | USA         | Cohort        | 3500        | Group A      | Group B    | Primary | 0.10        | Medium        |       |
| 87    | Grey et al.     | 2020 | Canada      | RCT           | 1400        | Group A      | Group B    | Primary | 0.17        | High          |       |
| 88    | White et al.    | 2017 | UK          | Case-control  | 2800        | Group A      | Group B    | Primary | 0.09        | Medium        |       |
| 89    | Black et al.    | 2019 | USA         | RCT           | 1600        | Group A      | Group B    | Primary | 0.16        | High          |       |
| 90    | Grey et al.     | 2018 | Canada      | Cohort        | 3800        | Group A      | Group B    | Primary | 0.11        | Medium        |       |
| 91    | White et al.    | 2020 | UK          | RCT           | 1200        | Group A      | Group B    | Primary | 0.14        | High          |       |
| 92    | Black et al.    | 2017 | USA         | Observational | 3200        | Group A      | Group B    | Primary | 0.07        | Medium        |       |
| 93    | Grey et al.     | 2019 | Canada      | RCT           | 1500        | Group A      | Group B    | Primary | 0.13        | High          |       |
| 94    | White et al.    | 2018 | UK          | Cohort        | 4100        | Group A      | Group B    | Primary | 0.10        | Medium        |       |
| 95    | Black et al.    | 2020 | USA         | RCT           | 1700        | Group A      | Group B    | Primary | 0.18        | High          |       |
| 96    | Grey et al.     | 2017 | Canada      | Case-control  | 2600        | Group A      | Group B    | Primary | 0.08        | Medium        |       |
| 97    | White et al.    | 2019 | UK          | RCT           | 1300        | Group A      | Group B    | Primary | 0.15        | High          |       |
| 98    | Black et al.    | 2018 | USA         | Cohort        | 3700        | Group A      | Group B    | Primary | 0.10        | Medium        |       |
| 99    | Grey et al.     | 2020 | Canada      | RCT           | 1400        | Group A      | Group B    | Primary | 0.17        | High          |       |
| 100   | White et al.    | 2017 | UK          | Case-control  | 2900        | Group A      | Group B    | Primary | 0.09        | Medium        |       |

| Study | Author          | Year | Country      | Design        | Sample Size | Intervention | Comparison | Outcome   | Quality Score |
|-------|-----------------|------|--------------|---------------|-------------|--------------|------------|-----------|---------------|
| 1     | Smith et al.    | 2018 | USA          | RCT           | 1000        | Group A      | Group B    | Primary   | 85            |
| 2     | Johnson et al.  | 2019 | UK           | Cohort        | 5000        | Group C      | Group D    | Secondary | 78            |
| 3     | Chen et al.     | 2020 | China        | RCT           | 2000        | Group E      | Group F    | Primary   | 92            |
| 4     | Lee et al.      | 2017 | South Korea  | Case-control  | 3000        | Group G      | Group H    | Secondary | 70            |
| 5     | Patel et al.    | 2016 | India        | Observational | 1500        | Group I      | Group J    | Primary   | 65            |
| 6     | Wang et al.     | 2015 | China        | RCT           | 800         | Group K      | Group L    | Primary   | 88            |
| 7     | Nguyen et al.   | 2014 | Vietnam      | Cohort        | 4000        | Group M      | Group N    | Secondary | 75            |
| 8     | Al-Sayid et al. | 2013 | Saudi Arabia | Case-control  | 2500        | Group O      | Group P    | Secondary | 68            |
| 9     | Kim et al.      | 2012 | South Korea  | RCT           | 1200        | Group Q      | Group R    | Primary   | 90            |
| 10    | Miller et al.   | 2011 | USA          | Observational | 6000        | Group S      | Group T    | Secondary | 72            |
| 11    | Yamamoto et al. | 2010 | Japan        | Cohort        | 3500        | Group U      | Group V    | Secondary | 77            |
| 12    | Abdullah et al. | 2009 | Malaysia     | RCT           | 900         | Group W      | Group X    | Primary   | 87            |
| 13    | Costa et al.    | 2008 | Brazil       | Case-control  | 2800        | Group Y      | Group Z    | Secondary | 69            |
| 14    | Nguyen et al.   | 2007 | Vietnam      | Observational | 1800        | Group AA     | Group AB   | Primary   | 66            |
| 15    | Chen et al.     | 2006 | China        | RCT           | 1100        | Group AC     | Group AD   | Primary   | 89            |
| 16    | Patel et al.    | 2005 | India        | Cohort        | 4500        | Group AE     | Group AF   | Secondary | 74            |
| 17    | Wang et al.     | 2004 | China        | Case-control  | 3200        | Group AG     | Group AH   | Secondary | 71            |
| 18    | Nguyen et al.   | 2003 | Vietnam      | RCT           | 1300        | Group AI     | Group AJ   | Primary   | 91            |
| 19    | Al-Sayid et al. | 2002 | Saudi Arabia | Observational | 7000        | Group AK     | Group AL   | Secondary | 73            |
| 20    | Kim et al.      | 2001 | South Korea  | Cohort        | 3800        | Group AM     | Group AN   | Secondary | 76            |
| 21    | Abdullah et al. | 2000 | Malaysia     | RCT           | 950         | Group AO     | Group AP   | Primary   | 86            |
| 22    | Costa et al.    | 1999 | Brazil       | Case-control  | 2900        | Group AQ     | Group AR   | Secondary | 70            |
| 23    | Nguyen et al.   | 1998 | Vietnam      | Observational | 1900        | Group AS     | Group AT   | Primary   | 67            |
| 24    | Chen et al.     | 1997 | China        | RCT           | 1050        | Group AU     | Group AV   | Primary   | 88            |
| 25    | Patel et al.    | 1996 | India        | Cohort        | 4800        | Group AW     | Group AX   | Secondary | 75            |
| 26    | Wang et al.     | 1995 | China        | Case-control  | 3400        | Group AY     | Group AZ   | Secondary | 72            |
| 27    | Nguyen et al.   | 1994 | Vietnam      | RCT           | 1400        | Group BA     | Group BB   | Primary   | 92            |
| 28    | Al-Sayid et al. | 1993 | Saudi Arabia | Observational | 7500        | Group BC     | Group BD   | Secondary | 74            |
| 29    | Kim et al.      | 1992 | South Korea  | Cohort        | 4200        | Group BE     | Group BF   | Secondary | 77            |
| 30    | Abdullah et al. | 1991 | Malaysia     | RCT           | 1000        | Group BG     | Group BH   | Primary   | 87            |
| 31    | Costa et al.    | 1990 | Brazil       | Case-control  | 3000        | Group BI     | Group BJ   | Secondary | 71            |
| 32    | Nguyen et al.   | 1989 | Vietnam      | Observational | 2000        | Group BK     | Group BL   | Primary   | 68            |
| 33    | Chen et al.     | 1988 | China        | RCT           | 1150        | Group BM     | Group BN   | Primary   | 89            |
| 34    | Patel et al.    | 1987 | India        | Cohort        | 5000        | Group BO     | Group BP   | Secondary | 76            |
| 35    | Wang et al.     | 1986 | China        | Case-control  | 3600        | Group BQ     | Group BR   | Secondary | 73            |
| 36    | Nguyen et al.   | 1985 | Vietnam      | RCT           | 1500        | Group BS     | Group BT   | Primary   | 93            |
| 37    | Al-Sayid et al. | 1984 | Saudi Arabia | Observational | 8000        | Group BU     | Group BV   | Secondary | 75            |
| 38    | Kim et al.      | 1983 | South Korea  | Cohort        | 4600        | Group BW     | Group BX   | Secondary | 78            |
| 39    | Abdullah et al. | 1982 | Malaysia     | RCT           | 1050        | Group BY     | Group BZ   | Primary   | 88            |
| 40    | Costa et al.    | 1981 | Brazil       | Case-control  | 3100        | Group CA     | Group CB   | Secondary | 72            |
| 41    | Nguyen et al.   | 1980 | Vietnam      | Observational | 2100        | Group CC     | Group CD   | Primary   | 69            |
| 42    | Chen et al.     | 1979 | China        | RCT           | 1200        | Group CE     | Group CF   | Primary   | 90            |
| 43    | Patel et al.    | 1978 | India        | Cohort        | 5200        | Group CG     | Group CH   | Secondary | 77            |
| 44    | Wang et al.     | 1977 | China        | Case-control  | 3800        | Group CI     | Group CJ   | Secondary | 74            |
| 45    | Nguyen et al.   | 1976 | Vietnam      | RCT           | 1600        | Group CK     | Group CL   | Primary   | 94            |
| 46    | Al-Sayid et al. | 1975 | Saudi Arabia | Observational | 8500        | Group CM     | Group CN   | Secondary | 76            |
| 47    | Kim et al.      | 1974 | South Korea  | Cohort        | 5000        | Group CO     | Group CP   | Secondary | 79            |
| 48    | Abdullah et al. | 1973 | Malaysia     | RCT           | 1100        | Group CQ     | Group CR   | Primary   | 89            |
| 49    | Costa et al.    | 1972 | Brazil       | Case-control  | 3200        | Group CS     | Group CT   | Secondary | 73            |
| 50    | Nguyen et al.   | 1971 | Vietnam      | Observational | 2200        | Group CU     | Group CV   | Primary   | 70            |
| 51    | Chen et al.     | 1970 | China        | RCT           | 1250        | Group CW     | Group CX   | Primary   | 91            |
| 52    | Patel et al.    | 1969 | India        | Cohort        | 5400        | Group CY     | Group CZ   | Secondary | 78            |
| 53    | Wang et al.     | 1968 | China        | Case-control  | 4000        | Group DA     | Group DB   | Secondary | 75            |
| 54    | Nguyen et al.   | 1967 | Vietnam      | RCT           | 1700        | Group DC     | Group DD   | Primary   | 95            |
| 55    | Al-Sayid et al. | 1966 | Saudi Arabia | Observational | 9000        | Group DE     | Group DF   | Secondary | 77            |
| 56    | Kim et al.      | 1965 | South Korea  | Cohort        | 5200        | Group DG     | Group DH   | Secondary | 80            |
| 57    | Abdullah et al. | 1964 | Malaysia     | RCT           | 1150        | Group DI     | Group DJ   | Primary   | 90            |
| 58    | Costa et al.    | 1963 | Brazil       | Case-control  | 3300        | Group DK     | Group DL   | Secondary | 74            |
| 59    | Nguyen et al.   | 1962 | Vietnam      | Observational | 2300        | Group DM     | Group DN   | Primary   | 71            |
| 60    | Chen et al.     | 1961 | China        | RCT           | 1300        | Group DO     | Group DP   | Primary   | 92            |
| 61    | Patel et al.    | 1960 | India        | Cohort        | 5600        | Group DQ     | Group DR   | Secondary | 79            |
| 62    | Wang et al.     | 1959 | China        | Case-control  | 4200        | Group DS     | Group DT   | Secondary | 76            |
| 63    | Nguyen et al.   | 1958 | Vietnam      | RCT           | 1800        | Group DU     | Group DV   | Primary   | 96            |
| 64    | Al-Sayid et al. | 1957 | Saudi Arabia | Observational | 9500        | Group DW     | Group DX   | Secondary | 78            |
| 65    | Kim et al.      | 1956 | South Korea  | Cohort        | 5400        | Group DY     | Group DZ   | Secondary | 81            |
| 66    | Abdullah et al. | 1955 | Malaysia     | RCT           | 1200        | Group EA     | Group EB   | Primary   | 91            |
| 67    | Costa et al.    | 1954 | Brazil       | Case-control  | 3400        | Group EC     | Group ED   | Secondary | 75            |
| 68    | Nguyen et al.   | 1953 | Vietnam      | Observational | 2400        | Group EE     | Group EF   | Primary   | 72            |
| 69    | Chen et al.     | 1952 | China        | RCT           | 1350        | Group EG     | Group EH   | Primary   | 93            |
| 70    | Patel et al.    | 1951 | India        | Cohort        | 5800        | Group EI     | Group EJ   | Secondary | 80            |
| 71    | Wang et al.     | 1950 | China        | Case-control  | 4400        | Group EK     | Group EL   | Secondary | 77            |
| 72    | Nguyen et al.   | 1949 | Vietnam      | RCT           | 1900        | Group EM     | Group EN   | Primary   | 97            |
| 73    | Al-Sayid et al. | 1948 | Saudi Arabia | Observational | 10000       | Group EO     | Group EP   | Secondary | 79            |
| 74    | Kim et al.      | 1947 | South Korea  | Cohort        | 5600        | Group EQ     | Group ER   | Secondary | 82            |
| 75    | Abdullah et al. | 1946 | Malaysia     | RCT           | 1250        | Group ES     | Group ET   | Primary   | 92            |
| 76    | Costa et al.    | 1945 | Brazil       | Case-control  | 3500        | Group EU     | Group EV   | Secondary | 76            |
| 77    | Nguyen et al.   | 1944 | Vietnam      | Observational | 2500        | Group EW     | Group EX   | Primary   | 73            |
| 78    | Chen et al.     | 1943 | China        | RCT           | 1400        | Group EY     | Group EZ   | Primary   | 94            |
| 79    | Patel et al.    | 1942 | India        | Cohort        | 6000        | Group FA     | Group FB   | Secondary | 81            |
| 80    | Wang et al.     | 1941 | China        | Case-control  | 4600        | Group FC     | Group FD   | Secondary | 78            |
| 81    | Nguyen et al.   | 1940 | Vietnam      | RCT           | 2000        | Group FE     | Group FF   | Primary   | 98            |
| 82    | Al-Sayid et al. | 1939 | Saudi Arabia | Observational | 10500       | Group FG     | Group FH   | Secondary | 80            |
| 83    | Kim et al.      | 1938 | South Korea  | Cohort        | 5800        | Group FI     | Group FJ   | Secondary | 83            |
| 84    | Abdullah et al. | 1937 | Malaysia     | RCT           | 1300        | Group FK     | Group FL   | Primary   | 93            |
| 85    | Costa et al.    | 1936 | Brazil       | Case-control  | 3600        | Group FM     | Group FN   | Secondary | 77            |
| 86    | Nguyen et al.   | 1935 | Vietnam      | Observational | 2600        | Group FO     | Group FP   | Primary   | 74            |
| 87    | Chen et al.     | 1934 | China        | RCT           | 1450        | Group FQ     | Group FR   | Primary   | 95            |
| 88    | Patel et al.    | 1933 | India        | Cohort        | 6200        | Group FS     | Group FT   | Secondary | 82            |
| 89    | Wang et al.     | 1932 | China        | Case-control  | 4800        | Group FU     | Group FV   | Secondary | 79            |
| 90    | Nguyen et al.   | 1931 | Vietnam      | RCT           | 2100        | Group FW     | Group FX   | Primary   | 99            |
| 91    | Al-Sayid et al. | 1930 | Saudi Arabia | Observational | 11000       | Group FY     | Group FZ   | Secondary | 81            |
| 92    | Kim et al.      | 1929 | South Korea  | Cohort        | 6000        | Group GA     | Group GB   | Secondary | 84            |
| 93    | Abdullah et al. | 1928 | Malaysia     | RCT           | 1350        | Group GC     | Group GD   | Primary   | 94            |
| 94    | Costa et al.    | 1927 | Brazil       | Case-control  | 3700        | Group GE     | Group GF   | Secondary | 78            |
| 95    | Nguyen et al.   | 1926 | Vietnam      | Observational | 2700        | Group GG     | Group GH   | Primary   | 75            |
| 96    | Chen et al.     | 1925 | China        | RCT           | 1500        | Group GI     | Group GJ   | Primary   | 96            |
| 97    | Patel et al.    | 1924 | India        | Cohort        | 6400        | Group GK     | Group GL   | Secondary | 83            |
| 98    | Wang et al.     | 1923 | China        | Case-control  | 5000        | Group GM     | Group GN   | Secondary | 80            |
| 99    | Nguyen et al.   | 1922 | Vietnam      | RCT           | 2200        | Group GO     | Group GP   | Primary   | 100           |
| 100   | Al-Sayid et al. | 1921 | Saudi Arabia | Observational | 11500       | Group GQ     | Group GR   | Secondary | 82            |



| Study | Author       | Year | Country | Design | Sample Size | Intervention | Comparison | Outcome | Quality Score | Notes |
|-------|--------------|------|---------|--------|-------------|--------------|------------|---------|---------------|-------|
| 1     | Smith et al. | 2018 | USA     | RCT    | 1000        | Group A      | Group B    | Primary | High          | ...   |
| 2     | ...          | ...  | ...     | ...    | ...         | ...          | ...        | ...     | ...           | ...   |
| 3     | ...          | ...  | ...     | ...    | ...         | ...          | ...        | ...     | ...           | ...   |
| 4     | ...          | ...  | ...     | ...    | ...         | ...          | ...        | ...     | ...           | ...   |
| 5     | ...          | ...  | ...     | ...    | ...         | ...          | ...        | ...     | ...           | ...   |
| 6     | ...          | ...  | ...     | ...    | ...         | ...          | ...        | ...     | ...           | ...   |
| 7     | ...          | ...  | ...     | ...    | ...         | ...          | ...        | ...     | ...           | ...   |
| 8     | ...          | ...  | ...     | ...    | ...         | ...          | ...        | ...     | ...           | ...   |
| 9     | ...          | ...  | ...     | ...    | ...         | ...          | ...        | ...     | ...           | ...   |
| 10    | ...          | ...  | ...     | ...    | ...         | ...          | ...        | ...     | ...           | ...   |
| 11    | ...          | ...  | ...     | ...    | ...         | ...          | ...        | ...     | ...           | ...   |
| 12    | ...          | ...  | ...     | ...    | ...         | ...          | ...        | ...     | ...           | ...   |
| 13    | ...          | ...  | ...     | ...    | ...         | ...          | ...        | ...     | ...           | ...   |
| 14    | ...          | ...  | ...     | ...    | ...         | ...          | ...        | ...     | ...           | ...   |
| 15    | ...          | ...  | ...     | ...    | ...         | ...          | ...        | ...     | ...           | ...   |
| 16    | ...          | ...  | ...     | ...    | ...         | ...          | ...        | ...     | ...           | ...   |
| 17    | ...          | ...  | ...     | ...    | ...         | ...          | ...        | ...     | ...           | ...   |
| 18    | ...          | ...  | ...     | ...    | ...         | ...          | ...        | ...     | ...           | ...   |
| 19    | ...          | ...  | ...     | ...    | ...         | ...          | ...        | ...     | ...           | ...   |
| 20    | ...          | ...  | ...     | ...    | ...         | ...          | ...        | ...     | ...           | ...   |
| 21    | ...          | ...  | ...     | ...    | ...         | ...          | ...        | ...     | ...           | ...   |
| 22    | ...          | ...  | ...     | ...    | ...         | ...          | ...        | ...     | ...           | ...   |
| 23    | ...          | ...  | ...     | ...    | ...         | ...          | ...        | ...     | ...           | ...   |
| 24    | ...          | ...  | ...     | ...    | ...         | ...          | ...        | ...     | ...           | ...   |
| 25    | ...          | ...  | ...     | ...    | ...         | ...          | ...        | ...     | ...           | ...   |
| 26    | ...          | ...  | ...     | ...    | ...         | ...          | ...        | ...     | ...           | ...   |
| 27    | ...          | ...  | ...     | ...    | ...         | ...          | ...        | ...     | ...           | ...   |
| 28    | ...          | ...  | ...     | ...    | ...         | ...          | ...        | ...     | ...           | ...   |
| 29    | ...          | ...  | ...     | ...    | ...         | ...          | ...        | ...     | ...           | ...   |
| 30    | ...          | ...  | ...     | ...    | ...         | ...          | ...        | ...     | ...           | ...   |
| 31    | ...          | ...  | ...     | ...    | ...         | ...          | ...        | ...     | ...           | ...   |
| 32    | ...          | ...  | ...     | ...    | ...         | ...          | ...        | ...     | ...           | ...   |
| 33    | ...          | ...  | ...     | ...    | ...         | ...          | ...        | ...     | ...           | ...   |
| 34    | ...          | ...  | ...     | ...    | ...         | ...          | ...        | ...     | ...           | ...   |
| 35    | ...          | ...  | ...     | ...    | ...         | ...          | ...        | ...     | ...           | ...   |
| 36    | ...          | ...  | ...     | ...    | ...         | ...          | ...        | ...     | ...           | ...   |
| 37    | ...          | ...  | ...     | ...    | ...         | ...          | ...        | ...     | ...           | ...   |
| 38    | ...          | ...  | ...     | ...    | ...         | ...          | ...        | ...     | ...           | ...   |
| 39    | ...          | ...  | ...     | ...    | ...         | ...          | ...        | ...     | ...           | ...   |
| 40    | ...          | ...  | ...     | ...    | ...         | ...          | ...        | ...     | ...           | ...   |
| 41    | ...          | ...  | ...     | ...    | ...         | ...          | ...        | ...     | ...           | ...   |
| 42    | ...          | ...  | ...     | ...    | ...         | ...          | ...        | ...     | ...           | ...   |
| 43    | ...          | ...  | ...     | ...    | ...         | ...          | ...        | ...     | ...           | ...   |
| 44    | ...          | ...  | ...     | ...    | ...         | ...          | ...        | ...     | ...           | ...   |
| 45    | ...          | ...  | ...     | ...    | ...         | ...          | ...        | ...     | ...           | ...   |
| 46    | ...          | ...  | ...     | ...    | ...         | ...          | ...        | ...     | ...           | ...   |
| 47    | ...          | ...  | ...     | ...    | ...         | ...          | ...        | ...     | ...           | ...   |
| 48    | ...          | ...  | ...     | ...    | ...         | ...          | ...        | ...     | ...           | ...   |
| 49    | ...          | ...  | ...     | ...    | ...         | ...          | ...        | ...     | ...           | ...   |
| 50    | ...          | ...  | ...     | ...    | ...         | ...          | ...        | ...     | ...           | ...   |
| 51    | ...          | ...  | ...     | ...    | ...         | ...          | ...        | ...     | ...           | ...   |
| 52    | ...          | ...  | ...     | ...    | ...         | ...          | ...        | ...     | ...           | ...   |
| 53    | ...          | ...  | ...     | ...    | ...         | ...          | ...        | ...     | ...           | ...   |
| 54    | ...          | ...  | ...     | ...    | ...         | ...          | ...        | ...     | ...           | ...   |
| 55    | ...          | ...  | ...     | ...    | ...         | ...          | ...        | ...     | ...           | ...   |
| 56    | ...          | ...  | ...     | ...    | ...         | ...          | ...        | ...     | ...           | ...   |
| 57    | ...          | ...  | ...     | ...    | ...         | ...          | ...        | ...     | ...           | ...   |
| 58    | ...          | ...  | ...     | ...    | ...         | ...          | ...        | ...     | ...           | ...   |
| 59    | ...          | ...  | ...     | ...    | ...         | ...          | ...        | ...     | ...           | ...   |
| 60    | ...          | ...  | ...     | ...    | ...         | ...          | ...        | ...     | ...           | ...   |
| 61    | ...          | ...  | ...     | ...    | ...         | ...          | ...        | ...     | ...           | ...   |
| 62    | ...          | ...  | ...     | ...    | ...         | ...          | ...        | ...     | ...           | ...   |
| 63    | ...          | ...  | ...     | ...    | ...         | ...          | ...        | ...     | ...           | ...   |
| 64    | ...          | ...  | ...     | ...    | ...         | ...          | ...        | ...     | ...           | ...   |
| 65    | ...          | ...  | ...     | ...    | ...         | ...          | ...        | ...     | ...           | ...   |
| 66    | ...          | ...  | ...     | ...    | ...         | ...          | ...        | ...     | ...           | ...   |
| 67    | ...          | ...  | ...     | ...    | ...         | ...          | ...        | ...     | ...           | ...   |
| 68    | ...          | ...  | ...     | ...    | ...         | ...          | ...        | ...     | ...           | ...   |
| 69    | ...          | ...  | ...     | ...    | ...         | ...          | ...        | ...     | ...           | ...   |
| 70    | ...          | ...  | ...     | ...    | ...         | ...          | ...        | ...     | ...           | ...   |
| 71    | ...          | ...  | ...     | ...    | ...         | ...          | ...        | ...     | ...           | ...   |
| 72    | ...          | ...  | ...     | ...    | ...         | ...          | ...        | ...     | ...           | ...   |
| 73    | ...          | ...  | ...     | ...    | ...         | ...          | ...        | ...     | ...           | ...   |
| 74    | ...          | ...  | ...     | ...    | ...         | ...          | ...        | ...     | ...           | ...   |
| 75    | ...          | ...  | ...     | ...    | ...         | ...          | ...        | ...     | ...           | ...   |
| 76    | ...          | ...  | ...     | ...    | ...         | ...          | ...        | ...     | ...           | ...   |
| 77    | ...          | ...  | ...     | ...    | ...         | ...          | ...        | ...     | ...           | ...   |
| 78    | ...          | ...  | ...     | ...    | ...         | ...          | ...        | ...     | ...           | ...   |
| 79    | ...          | ...  | ...     | ...    | ...         | ...          | ...        | ...     | ...           | ...   |
| 80    | ...          | ...  | ...     | ...    | ...         | ...          | ...        | ...     | ...           | ...   |
| 81    | ...          | ...  | ...     | ...    | ...         | ...          | ...        | ...     | ...           | ...   |
| 82    | ...          | ...  | ...     | ...    | ...         | ...          | ...        | ...     | ...           | ...   |
| 83    | ...          | ...  | ...     | ...    | ...         | ...          | ...        | ...     | ...           | ...   |
| 84    | ...          | ...  | ...     | ...    | ...         | ...          | ...        | ...     | ...           | ...   |
| 85    | ...          | ...  | ...     | ...    | ...         | ...          | ...        | ...     | ...           | ...   |
| 86    | ...          | ...  | ...     | ...    | ...         | ...          | ...        | ...     | ...           | ...   |
| 87    | ...          | ...  | ...     | ...    | ...         | ...          | ...        | ...     | ...           | ...   |
| 88    | ...          | ...  | ...     | ...    | ...         | ...          | ...        | ...     | ...           | ...   |
| 89    | ...          | ...  | ...     | ...    | ...         | ...          | ...        | ...     | ...           | ...   |
| 90    | ...          | ...  | ...     | ...    | ...         | ...          | ...        | ...     | ...           | ...   |
| 91    | ...          | ...  | ...     | ...    | ...         | ...          | ...        | ...     | ...           | ...   |
| 92    | ...          | ...  | ...     | ...    | ...         | ...          | ...        | ...     | ...           | ...   |
| 93    | ...          | ...  | ...     | ...    | ...         | ...          | ...        | ...     | ...           | ...   |
| 94    | ...          | ...  | ...     | ...    | ...         | ...          | ...        | ...     | ...           | ...   |
| 95    | ...          | ...  | ...     | ...    | ...         | ...          | ...        | ...     | ...           | ...   |
| 96    | ...          | ...  | ...     | ...    | ...         | ...          | ...        | ...     | ...           | ...   |
| 97    | ...          | ...  | ...     | ...    | ...         | ...          | ...        | ...     | ...           | ...   |
| 98    | ...          | ...  | ...     | ...    | ...         | ...          | ...        | ...     | ...           | ...   |
| 99    | ...          | ...  | ...     | ...    | ...         | ...          | ...        | ...     | ...           | ...   |
| 100   | ...          | ...  | ...     | ...    | ...         | ...          | ...        | ...     | ...           | ...   |

| Study | Author | Year | Country | Design | Sample Size | Intervention | Comparison | Outcome | Quality Score | Notes |
|-------|--------|------|---------|--------|-------------|--------------|------------|---------|---------------|-------|
| 1     | 1      | 1    | 1       | 1      | 1           | 1            | 1          | 1       | 1             | 1     |
| 2     | 2      | 2    | 2       | 2      | 2           | 2            | 2          | 2       | 2             | 2     |
| 3     | 3      | 3    | 3       | 3      | 3           | 3            | 3          | 3       | 3             | 3     |
| 4     | 4      | 4    | 4       | 4      | 4           | 4            | 4          | 4       | 4             | 4     |
| 5     | 5      | 5    | 5       | 5      | 5           | 5            | 5          | 5       | 5             | 5     |
| 6     | 6      | 6    | 6       | 6      | 6           | 6            | 6          | 6       | 6             | 6     |
| 7     | 7      | 7    | 7       | 7      | 7           | 7            | 7          | 7       | 7             | 7     |
| 8     | 8      | 8    | 8       | 8      | 8           | 8            | 8          | 8       | 8             | 8     |
| 9     | 9      | 9    | 9       | 9      | 9           | 9            | 9          | 9       | 9             | 9     |
| 10    | 10     | 10   | 10      | 10     | 10          | 10           | 10         | 10      | 10            | 10    |
| 11    | 11     | 11   | 11      | 11     | 11          | 11           | 11         | 11      | 11            | 11    |
| 12    | 12     | 12   | 12      | 12     | 12          | 12           | 12         | 12      | 12            | 12    |
| 13    | 13     | 13   | 13      | 13     | 13          | 13           | 13         | 13      | 13            | 13    |
| 14    | 14     | 14   | 14      | 14     | 14          | 14           | 14         | 14      | 14            | 14    |
| 15    | 15     | 15   | 15      | 15     | 15          | 15           | 15         | 15      | 15            | 15    |
| 16    | 16     | 16   | 16      | 16     | 16          | 16           | 16         | 16      | 16            | 16    |
| 17    | 17     | 17   | 17      | 17     | 17          | 17           | 17         | 17      | 17            | 17    |
| 18    | 18     | 18   | 18      | 18     | 18          | 18           | 18         | 18      | 18            | 18    |
| 19    | 19     | 19   | 19      | 19     | 19          | 19           | 19         | 19      | 19            | 19    |
| 20    | 20     | 20   | 20      | 20     | 20          | 20           | 20         | 20      | 20            | 20    |
| 21    | 21     | 21   | 21      | 21     | 21          | 21           | 21         | 21      | 21            | 21    |
| 22    | 22     | 22   | 22      | 22     | 22          | 22           | 22         | 22      | 22            | 22    |
| 23    | 23     | 23   | 23      | 23     | 23          | 23           | 23         | 23      | 23            | 23    |
| 24    | 24     | 24   | 24      | 24     | 24          | 24           | 24         | 24      | 24            | 24    |
| 25    | 25     | 25   | 25      | 25     | 25          | 25           | 25         | 25      | 25            | 25    |
| 26    | 26     | 26   | 26      | 26     | 26          | 26           | 26         | 26      | 26            | 26    |
| 27    | 27     | 27   | 27      | 27     | 27          | 27           | 27         | 27      | 27            | 27    |
| 28    | 28     | 28   | 28      | 28     | 28          | 28           | 28         | 28      | 28            | 28    |
| 29    | 29     | 29   | 29      | 29     | 29          | 29           | 29         | 29      | 29            | 29    |
| 30    | 30     | 30   | 30      | 30     | 30          | 30           | 30         | 30      | 30            | 30    |
| 31    | 31     | 31   | 31      | 31     | 31          | 31           | 31         | 31      | 31            | 31    |
| 32    | 32     | 32   | 32      | 32     | 32          | 32           | 32         | 32      | 32            | 32    |
| 33    | 33     | 33   | 33      | 33     | 33          | 33           | 33         | 33      | 33            | 33    |
| 34    | 34     | 34   | 34      | 34     | 34          | 34           | 34         | 34      | 34            | 34    |
| 35    | 35     | 35   | 35      | 35     | 35          | 35           | 35         | 35      | 35            | 35    |
| 36    | 36     | 36   | 36      | 36     | 36          | 36           | 36         | 36      | 36            | 36    |
| 37    | 37     | 37   | 37      | 37     | 37          | 37           | 37         | 37      | 37            | 37    |
| 38    | 38     | 38   | 38      | 38     | 38          | 38           | 38         | 38      | 38            | 38    |
| 39    | 39     | 39   | 39      | 39     | 39          | 39           | 39         | 39      | 39            | 39    |
| 40    | 40     | 40   | 40      | 40     | 40          | 40           | 40         | 40      | 40            | 40    |
| 41    | 41     | 41   | 41      | 41     | 41          | 41           | 41         | 41      | 41            | 41    |
| 42    | 42     | 42   | 42      | 42     | 42          | 42           | 42         | 42      | 42            | 42    |
| 43    | 43     | 43   | 43      | 43     | 43          | 43           | 43         | 43      | 43            | 43    |
| 44    | 44     | 44   | 44      | 44     | 44          | 44           | 44         | 44      | 44            | 44    |
| 45    | 45     | 45   | 45      | 45     | 45          | 45           | 45         | 45      | 45            | 45    |
| 46    | 46     | 46   | 46      | 46     | 46          | 46           | 46         | 46      | 46            | 46    |
| 47    | 47     | 47   | 47      | 47     | 47          | 47           | 47         | 47      | 47            | 47    |
| 48    | 48     | 48   | 48      | 48     | 48          | 48           | 48         | 48      | 48            | 48    |
| 49    | 49     | 49   | 49      | 49     | 49          | 49           | 49         | 49      | 49            | 49    |
| 50    | 50     | 50   | 50      | 50     | 50          | 50           | 50         | 50      | 50            | 50    |
| 51    | 51     | 51   | 51      | 51     | 51          | 51           | 51         | 51      | 51            | 51    |
| 52    | 52     | 52   | 52      | 52     | 52          | 52           | 52         | 52      | 52            | 52    |
| 53    | 53     | 53   | 53      | 53     | 53          | 53           | 53         | 53      | 53            | 53    |
| 54    | 54     | 54   | 54      | 54     | 54          | 54           | 54         | 54      | 54            | 54    |
| 55    | 55     | 55   | 55      | 55     | 55          | 55           | 55         | 55      | 55            | 55    |
| 56    | 56     | 56   | 56      | 56     | 56          | 56           | 56         | 56      | 56            | 56    |
| 57    | 57     | 57   | 57      | 57     | 57          | 57           | 57         | 57      | 57            | 57    |
| 58    | 58     | 58   | 58      | 58     | 58          | 58           | 58         | 58      | 58            | 58    |
| 59    | 59     | 59   | 59      | 59     | 59          | 59           | 59         | 59      | 59            | 59    |
| 60    | 60     | 60   | 60      | 60     | 60          | 60           | 60         | 60      | 60            | 60    |
| 61    | 61     | 61   | 61      | 61     | 61          | 61           | 61         | 61      | 61            | 61    |
| 62    | 62     | 62   | 62      | 62     | 62          | 62           | 62         | 62      | 62            | 62    |
| 63    | 63     | 63   | 63      | 63     | 63          | 63           | 63         | 63      | 63            | 63    |
| 64    | 64     | 64   | 64      | 64     | 64          | 64           | 64         | 64      | 64            | 64    |
| 65    | 65     | 65   | 65      | 65     | 65          | 65           | 65         | 65      | 65            | 65    |
| 66    | 66     | 66   | 66      | 66     | 66          | 66           | 66         | 66      | 66            | 66    |
| 67    | 67     | 67   | 67      | 67     | 67          | 67           | 67         | 67      | 67            | 67    |
| 68    | 68     | 68   | 68      | 68     | 68          | 68           | 68         | 68      | 68            | 68    |
| 69    | 69     | 69   | 69      | 69     | 69          | 69           | 69         | 69      | 69            | 69    |
| 70    | 70     | 70   | 70      | 70     | 70          | 70           | 70         | 70      | 70            | 70    |
| 71    | 71     | 71   | 71      | 71     | 71          | 71           | 71         | 71      | 71            | 71    |
| 72    | 72     | 72   | 72      | 72     | 72          | 72           | 72         | 72      | 72            | 72    |
| 73    | 73     | 73   | 73      | 73     | 73          | 73           | 73         | 73      | 73            | 73    |
| 74    | 74     | 74   | 74      | 74     | 74          | 74           | 74         | 74      | 74            | 74    |
| 75    | 75     | 75   | 75      | 75     | 75          | 75           | 75         | 75      | 75            | 75    |
| 76    | 76     | 76   | 76      | 76     | 76          | 76           | 76         | 76      | 76            | 76    |
| 77    | 77     | 77   | 77      | 77     | 77          | 77           | 77         | 77      | 77            | 77    |
| 78    | 78     | 78   | 78      | 78     | 78          | 78           | 78         | 78      | 78            | 78    |
| 79    | 79     | 79   | 79      | 79     | 79          | 79           | 79         | 79      | 79            | 79    |
| 80    | 80     | 80   | 80      | 80     | 80          | 80           | 80         | 80      | 80            | 80    |
| 81    | 81     | 81   | 81      | 81     | 81          | 81           | 81         | 81      | 81            | 81    |
| 82    | 82     | 82   | 82      | 82     | 82          | 82           | 82         | 82      | 82            | 82    |
| 83    | 83     | 83   | 83      | 83     | 83          | 83           | 83         | 83      | 83            | 83    |
| 84    | 84     | 84   | 84      | 84     | 84          | 84           | 84         | 84      | 84            | 84    |
| 85    | 85     | 85   | 85      | 85     | 85          | 85           | 85         | 85      | 85            | 85    |
| 86    | 86     | 86   | 86      | 86     | 86          | 86           | 86         | 86      | 86            | 86    |
| 87    | 87     | 87   | 87      | 87     | 87          | 87           | 87         | 87      | 87            | 87    |
| 88    | 88     | 88   | 88      | 88     | 88          | 88           | 88         | 88      | 88            | 88    |
| 89    | 89     | 89   | 89      | 89     | 89          | 89           | 89         | 89      | 89            | 89    |
| 90    | 90     | 90   | 90      | 90     | 90          | 90           | 90         | 90      | 90            | 90    |
| 91    | 91     | 91   | 91      | 91     | 91          | 91           | 91         | 91      | 91            | 91    |
| 92    | 92     | 92   | 92      | 92     | 92          | 92           | 92         | 92      | 92            | 92    |
| 93    | 93     | 93   | 93      | 93     | 93          | 93           | 93         | 93      | 93            | 93    |
| 94    | 94     | 94   | 94      | 94     | 94          | 94           | 94         | 94      | 94            | 94    |
| 95    | 95     | 95   | 95      | 95     | 95          | 95           | 95         | 95      | 95            | 95    |
| 96    | 96     | 96   | 96      | 96     | 96          | 96           | 96         | 96      | 96            | 96    |
| 97    | 97     | 97   | 97      | 97     | 97          | 97           | 97         | 97      | 97            | 97    |
| 98    | 98     | 98   | 98      | 98     | 98          | 98           | 98         | 98      | 98            | 98    |
| 99    | 99     | 99   | 99      | 99     | 99          | 99           | 99         | 99      | 99            | 99    |
| 100   | 100    | 100  | 100     | 100    | 100         | 100          | 100        | 100     | 100           | 100   |



| Study ID | Author          | Year | Country     | Design       | Population | Intervention | Comparison | Outcomes           | Quality Score | Notes |
|----------|-----------------|------|-------------|--------------|------------|--------------|------------|--------------------|---------------|-------|
| 1        | Smith et al.    | 2018 | USA         | RCT          | Adults     | Group A      | Group B    | Primary, Secondary | High          | ...   |
| 2        | Johnson et al.  | 2019 | UK          | Cohort       | Children   | Group C      | Group D    | Primary, Secondary | Medium        | ...   |
| 3        | Chen et al.     | 2020 | China       | RCT          | Elderly    | Group E      | Group F    | Primary, Secondary | High          | ...   |
| 4        | Lee et al.      | 2017 | South Korea | Case-control | Adults     | Group G      | Group H    | Primary, Secondary | Medium        | ...   |
| 5        | Patel et al.    | 2019 | India       | RCT          | Children   | Group I      | Group J    | Primary, Secondary | High          | ...   |
| 6        | Nguyen et al.   | 2018 | Vietnam     | Cohort       | Adults     | Group K      | Group L    | Primary, Secondary | Medium        | ...   |
| 7        | Wang et al.     | 2020 | China       | RCT          | Adults     | Group M      | Group N    | Primary, Secondary | High          | ...   |
| 8        | Kim et al.      | 2019 | South Korea | Cohort       | Children   | Group O      | Group P    | Primary, Secondary | Medium        | ...   |
| 9        | Alvarez et al.  | 2018 | Spain       | RCT          | Adults     | Group Q      | Group R    | Primary, Secondary | High          | ...   |
| 10       | Costa et al.    | 2017 | Brazil      | Cohort       | Adults     | Group S      | Group T    | Primary, Secondary | Medium        | ...   |
| 11       | Miller et al.   | 2019 | USA         | RCT          | Children   | Group U      | Group V    | Primary, Secondary | High          | ...   |
| 12       | De Silva et al. | 2018 | Sri Lanka   | Cohort       | Adults     | Group W      | Group X    | Primary, Secondary | Medium        | ...   |
| 13       | Nguyen et al.   | 2020 | Vietnam     | RCT          | Adults     | Group Y      | Group Z    | Primary, Secondary | High          | ...   |
| 14       | Chen et al.     | 2019 | China       | Cohort       | Children   | Group AA     | Group AB   | Primary, Secondary | Medium        | ...   |
| 15       | Patel et al.    | 2018 | India       | RCT          | Adults     | Group AC     | Group AD   | Primary, Secondary | High          | ...   |
| 16       | Nguyen et al.   | 2017 | Vietnam     | Cohort       | Adults     | Group AE     | Group AF   | Primary, Secondary | Medium        | ...   |
| 17       | Wang et al.     | 2020 | China       | RCT          | Children   | Group AG     | Group AH   | Primary, Secondary | High          | ...   |
| 18       | Kim et al.      | 2019 | South Korea | Cohort       | Adults     | Group AI     | Group AJ   | Primary, Secondary | Medium        | ...   |
| 19       | Alvarez et al.  | 2018 | Spain       | RCT          | Children   | Group AK     | Group AL   | Primary, Secondary | High          | ...   |
| 20       | Costa et al.    | 2017 | Brazil      | Cohort       | Adults     | Group AM     | Group AN   | Primary, Secondary | Medium        | ...   |
| 21       | Miller et al.   | 2019 | USA         | RCT          | Adults     | Group AO     | Group AP   | Primary, Secondary | High          | ...   |
| 22       | De Silva et al. | 2018 | Sri Lanka   | Cohort       | Children   | Group AQ     | Group AR   | Primary, Secondary | Medium        | ...   |
| 23       | Nguyen et al.   | 2020 | Vietnam     | RCT          | Adults     | Group AS     | Group AT   | Primary, Secondary | High          | ...   |
| 24       | Chen et al.     | 2019 | China       | Cohort       | Adults     | Group AU     | Group AV   | Primary, Secondary | Medium        | ...   |
| 25       | Patel et al.    | 2018 | India       | RCT          | Children   | Group AW     | Group AX   | Primary, Secondary | High          | ...   |
| 26       | Nguyen et al.   | 2017 | Vietnam     | Cohort       | Adults     | Group AY     | Group AZ   | Primary, Secondary | Medium        | ...   |
| 27       | Wang et al.     | 2020 | China       | RCT          | Adults     | Group BA     | Group BB   | Primary, Secondary | High          | ...   |
| 28       | Kim et al.      | 2019 | South Korea | Cohort       | Children   | Group BC     | Group BD   | Primary, Secondary | Medium        | ...   |
| 29       | Alvarez et al.  | 2018 | Spain       | RCT          | Adults     | Group BE     | Group BF   | Primary, Secondary | High          | ...   |
| 30       | Costa et al.    | 2017 | Brazil      | Cohort       | Children   | Group BG     | Group BH   | Primary, Secondary | Medium        | ...   |
| 31       | Miller et al.   | 2019 | USA         | RCT          | Adults     | Group BI     | Group BJ   | Primary, Secondary | High          | ...   |
| 32       | De Silva et al. | 2018 | Sri Lanka   | Cohort       | Adults     | Group BK     | Group BL   | Primary, Secondary | Medium        | ...   |
| 33       | Nguyen et al.   | 2020 | Vietnam     | RCT          | Children   | Group BM     | Group BN   | Primary, Secondary | High          | ...   |
| 34       | Chen et al.     | 2019 | China       | Cohort       | Adults     | Group BO     | Group BP   | Primary, Secondary | Medium        | ...   |
| 35       | Patel et al.    | 2018 | India       | RCT          | Adults     | Group BQ     | Group BR   | Primary, Secondary | High          | ...   |
| 36       | Nguyen et al.   | 2017 | Vietnam     | Cohort       | Children   | Group BS     | Group BT   | Primary, Secondary | Medium        | ...   |
| 37       | Wang et al.     | 2020 | China       | RCT          | Adults     | Group BU     | Group BV   | Primary, Secondary | High          | ...   |
| 38       | Kim et al.      | 2019 | South Korea | Cohort       | Adults     | Group BW     | Group BX   | Primary, Secondary | Medium        | ...   |
| 39       | Alvarez et al.  | 2018 | Spain       | RCT          | Children   | Group BY     | Group BZ   | Primary, Secondary | High          | ...   |
| 40       | Costa et al.    | 2017 | Brazil      | Cohort       | Adults     | Group CA     | Group CB   | Primary, Secondary | Medium        | ...   |
| 41       | Miller et al.   | 2019 | USA         | RCT          | Adults     | Group CC     | Group CD   | Primary, Secondary | High          | ...   |
| 42       | De Silva et al. | 2018 | Sri Lanka   | Cohort       | Children   | Group CE     | Group CF   | Primary, Secondary | Medium        | ...   |
| 43       | Nguyen et al.   | 2020 | Vietnam     | RCT          | Adults     | Group CG     | Group CH   | Primary, Secondary | High          | ...   |
| 44       | Chen et al.     | 2019 | China       | Cohort       | Adults     | Group CI     | Group CJ   | Primary, Secondary | Medium        | ...   |
| 45       | Patel et al.    | 2018 | India       | RCT          | Children   | Group CK     | Group CL   | Primary, Secondary | High          | ...   |
| 46       | Nguyen et al.   | 2017 | Vietnam     | Cohort       | Adults     | Group CM     | Group CN   | Primary, Secondary | Medium        | ...   |
| 47       | Wang et al.     | 2020 | China       | RCT          | Adults     | Group CO     | Group CP   | Primary, Secondary | High          | ...   |
| 48       | Kim et al.      | 2019 | South Korea | Cohort       | Children   | Group CQ     | Group CR   | Primary, Secondary | Medium        | ...   |
| 49       | Alvarez et al.  | 2018 | Spain       | RCT          | Adults     | Group CS     | Group CT   | Primary, Secondary | High          | ...   |
| 50       | Costa et al.    | 2017 | Brazil      | Cohort       | Adults     | Group CU     | Group CV   | Primary, Secondary | Medium        | ...   |
| 51       | Miller et al.   | 2019 | USA         | RCT          | Children   | Group CW     | Group CX   | Primary, Secondary | High          | ...   |
| 52       | De Silva et al. | 2018 | Sri Lanka   | Cohort       | Adults     | Group CY     | Group CZ   | Primary, Secondary | Medium        | ...   |
| 53       | Nguyen et al.   | 2020 | Vietnam     | RCT          | Adults     | Group DA     | Group DB   | Primary, Secondary | High          | ...   |
| 54       | Chen et al.     | 2019 | China       | Cohort       | Children   | Group DC     | Group DD   | Primary, Secondary | Medium        | ...   |
| 55       | Patel et al.    | 2018 | India       | RCT          | Adults     | Group DE     | Group DF   | Primary, Secondary | High          | ...   |
| 56       | Nguyen et al.   | 2017 | Vietnam     | Cohort       | Adults     | Group DG     | Group DH   | Primary, Secondary | Medium        | ...   |
| 57       | Wang et al.     | 2020 | China       | RCT          | Children   | Group DI     | Group DJ   | Primary, Secondary | High          | ...   |
| 58       | Kim et al.      | 2019 | South Korea | Cohort       | Adults     | Group DK     | Group DL   | Primary, Secondary | Medium        | ...   |
| 59       | Alvarez et al.  | 2018 | Spain       | RCT          | Adults     | Group DM     | Group DN   | Primary, Secondary | High          | ...   |
| 60       | Costa et al.    | 2017 | Brazil      | Cohort       | Children   | Group DO     | Group DP   | Primary, Secondary | Medium        | ...   |
| 61       | Miller et al.   | 2019 | USA         | RCT          | Adults     | Group DQ     | Group DR   | Primary, Secondary | High          | ...   |
| 62       | De Silva et al. | 2018 | Sri Lanka   | Cohort       | Adults     | Group DS     | Group DT   | Primary, Secondary | Medium        | ...   |
| 63       | Nguyen et al.   | 2020 | Vietnam     | RCT          | Children   | Group DU     | Group DV   | Primary, Secondary | High          | ...   |
| 64       | Chen et al.     | 2019 | China       | Cohort       | Adults     | Group DW     | Group DX   | Primary, Secondary | Medium        | ...   |
| 65       | Patel et al.    | 2018 | India       | RCT          | Adults     | Group DY     | Group DZ   | Primary, Secondary | High          | ...   |
| 66       | Nguyen et al.   | 2017 | Vietnam     | Cohort       | Children   | Group EA     | Group EB   | Primary, Secondary | Medium        | ...   |
| 67       | Wang et al.     | 2020 | China       | RCT          | Adults     | Group EC     | Group ED   | Primary, Secondary | High          | ...   |
| 68       | Kim et al.      | 2019 | South Korea | Cohort       | Adults     | Group EE     | Group EF   | Primary, Secondary | Medium        | ...   |
| 69       | Alvarez et al.  | 2018 | Spain       | RCT          | Children   | Group EG     | Group EH   | Primary, Secondary | High          | ...   |
| 70       | Costa et al.    | 2017 | Brazil      | Cohort       | Adults     | Group EI     | Group EJ   | Primary, Secondary | Medium        | ...   |
| 71       | Miller et al.   | 2019 | USA         | RCT          | Adults     | Group EK     | Group EL   | Primary, Secondary | High          | ...   |
| 72       | De Silva et al. | 2018 | Sri Lanka   | Cohort       | Children   | Group EM     | Group EN   | Primary, Secondary | Medium        | ...   |
| 73       | Nguyen et al.   | 2020 | Vietnam     | RCT          | Adults     | Group EO     | Group EP   | Primary, Secondary | High          | ...   |
| 74       | Chen et al.     | 2019 | China       | Cohort       | Adults     | Group EQ     | Group ER   | Primary, Secondary | Medium        | ...   |
| 75       | Patel et al.    | 2018 | India       | RCT          | Children   | Group ES     | Group ET   | Primary, Secondary | High          | ...   |
| 76       | Nguyen et al.   | 2017 | Vietnam     | Cohort       | Adults     | Group EU     | Group EV   | Primary, Secondary | Medium        | ...   |
| 77       | Wang et al.     | 2020 | China       | RCT          | Adults     | Group EW     | Group EX   | Primary, Secondary | High          | ...   |
| 78       | Kim et al.      | 2019 | South Korea | Cohort       | Children   | Group EY     | Group EZ   | Primary, Secondary | Medium        | ...   |
| 79       | Alvarez et al.  | 2018 | Spain       | RCT          | Adults     | Group FA     | Group FB   | Primary, Secondary | High          | ...   |
| 80       | Costa et al.    | 2017 | Brazil      | Cohort       | Adults     | Group FC     | Group FD   | Primary, Secondary | Medium        | ...   |
| 81       | Miller et al.   | 2019 | USA         | RCT          | Children   | Group FE     | Group FF   | Primary, Secondary | High          | ...   |
| 82       | De Silva et al. | 2018 | Sri Lanka   | Cohort       | Adults     | Group FG     | Group FH   | Primary, Secondary | Medium        | ...   |
| 83       | Nguyen et al.   | 2020 | Vietnam     | RCT          | Adults     | Group FI     | Group FJ   | Primary, Secondary | High          | ...   |
| 84       | Chen et al.     | 2019 | China       | Cohort       | Children   | Group FK     | Group FL   | Primary, Secondary | Medium        | ...   |
| 85       | Patel et al.    | 2018 | India       | RCT          | Adults     | Group FM     | Group FN   | Primary, Secondary | High          | ...   |
| 86       | Nguyen et al.   | 2017 | Vietnam     | Cohort       | Adults     | Group FO     | Group FP   | Primary, Secondary | Medium        | ...   |
| 87       | Wang et al.     | 2020 | China       | RCT          | Children   | Group FQ     | Group FR   | Primary, Secondary | High          | ...   |
| 88       | Kim et al.      | 2019 | South Korea | Cohort       | Adults     | Group FS     | Group FT   | Primary, Secondary | Medium        | ...   |
| 89       | Alvarez et al.  | 2018 | Spain       | RCT          | Adults     | Group FU     | Group FV   | Primary, Secondary | High          | ...   |
| 90       | Costa et al.    | 2017 | Brazil      | Cohort       | Children   | Group FW     | Group FX   | Primary, Secondary | Medium        | ...   |
| 91       | Miller et al.   | 2019 | USA         | RCT          | Adults     | Group FY     | Group FZ   | Primary, Secondary | High          | ...   |
| 92       | De Silva et al. | 2018 | Sri Lanka   | Cohort       | Adults     | Group GA     | Group GB   | Primary, Secondary | Medium        | ...   |
| 93       | Nguyen et al.   | 2020 | Vietnam     | RCT          | Children   | Group GC     | Group GD   | Primary, Secondary | High          | ...   |
| 94       | Chen et al.     | 2019 | China       | Cohort       | Adults     | Group GE     | Group GF   | Primary, Secondary | Medium        | ...   |
| 95       | Patel et al.    | 2018 | India       | RCT          | Adults     | Group GG     | Group GH   | Primary, Secondary | High          | ...   |
| 96       | Nguyen et al.   | 2017 | Vietnam     | Cohort       | Children   | Group GI     | Group GJ   | Primary, Secondary | Medium        | ...   |
| 97       | Wang et al.     | 2020 | China       | RCT          | Adults     | Group GK     | Group GL   | Primary, Secondary | High          | ...   |
| 98       | Kim et al.      | 2019 | South Korea | Cohort       | Adults     | Group GM     | Group GN   | Primary, Secondary | Medium        | ...   |
| 99       | Alvarez et al.  | 2018 | Spain       | RCT          | Children   | Group GO     | Group GP   | Primary, Secondary | High          | ...   |
| 100      | Costa et al.    | 2017 | Brazil      | Cohort       | Adults     | Group GQ     | Group GR   | Primary, Secondary | Medium        | ...   |

| Study ID | Author         | Year | Country     | Design       | Sample Size | Intervention | Comparison | Outcome   | Effect Size | Quality Score | Notes          |
|----------|----------------|------|-------------|--------------|-------------|--------------|------------|-----------|-------------|---------------|----------------|
| 1        | Smith et al.   | 2018 | USA         | RCT          | 1000        | Group A      | Group B    | Primary   | 0.15        | 85            | High quality   |
| 2        | Johnson et al. | 2019 | UK          | Cohort       | 5000        | Group A      | Group B    | Secondary | 0.10        | 70            | Medium quality |
| 3        | Chen et al.    | 2020 | China       | RCT          | 2000        | Group A      | Group B    | Primary   | 0.20        | 90            | High quality   |
| 4        | Lee et al.     | 2017 | South Korea | Case-control | 3000        | Group A      | Group B    | Secondary | 0.08        | 60            | Low quality    |
| 5        | Patel et al.   | 2019 | India       | RCT          | 1500        | Group A      | Group B    | Primary   | 0.18        | 80            | Medium quality |
| 6        | Wang et al.    | 2018 | China       | Cohort       | 8000        | Group A      | Group B    | Secondary | 0.12        | 75            | Medium quality |
| 7        | Nguyen et al.  | 2020 | Vietnam     | RCT          | 1200        | Group A      | Group B    | Primary   | 0.22        | 92            | High quality   |
| 8        | Okamoto et al. | 2017 | Japan       | Case-control | 4000        | Group A      | Group B    | Secondary | 0.09        | 65            | Low quality    |
| 9        | Almeida et al. | 2019 | Brazil      | RCT          | 1800        | Group A      | Group B    | Primary   | 0.16        | 82            | Medium quality |
| 10       | Kim et al.     | 2018 | South Korea | Cohort       | 6000        | Group A      | Group B    | Secondary | 0.11        | 72            | Medium quality |
| 11       | Miller et al.  | 2020 | USA         | RCT          | 1100        | Group A      | Group B    | Primary   | 0.19        | 88            | High quality   |
| 12       | Das et al.     | 2017 | India       | Case-control | 2500        | Group A      | Group B    | Secondary | 0.07        | 55            | Low quality    |
| 13       | Nguyen et al.  | 2019 | Vietnam     | RCT          | 1400        | Group A      | Group B    | Primary   | 0.17        | 83            | Medium quality |
| 14       | Wang et al.    | 2018 | China       | Cohort       | 7000        | Group A      | Group B    | Secondary | 0.13        | 77            | Medium quality |
| 15       | Patel et al.   | 2020 | India       | RCT          | 1600        | Group A      | Group B    | Primary   | 0.18        | 84            | Medium quality |
| 16       | Chen et al.    | 2017 | China       | Case-control | 3500        | Group A      | Group B    | Secondary | 0.08        | 62            | Low quality    |
| 17       | Okamoto et al. | 2019 | Japan       | RCT          | 1300        | Group A      | Group B    | Primary   | 0.21        | 91            | High quality   |
| 18       | Almeida et al. | 2018 | Brazil      | Cohort       | 5500        | Group A      | Group B    | Secondary | 0.10        | 71            | Medium quality |
| 19       | Kim et al.     | 2020 | South Korea | RCT          | 1700        | Group A      | Group B    | Primary   | 0.19        | 87            | High quality   |
| 20       | Das et al.     | 2017 | India       | Case-control | 2800        | Group A      | Group B    | Secondary | 0.07        | 58            | Low quality    |
| 21       | Nguyen et al.  | 2019 | Vietnam     | RCT          | 1500        | Group A      | Group B    | Primary   | 0.17        | 83            | Medium quality |
| 22       | Wang et al.    | 2018 | China       | Cohort       | 6500        | Group A      | Group B    | Secondary | 0.11        | 73            | Medium quality |
| 23       | Patel et al.   | 2020 | India       | RCT          | 1400        | Group A      | Group B    | Primary   | 0.18        | 84            | Medium quality |
| 24       | Chen et al.    | 2017 | China       | Case-control | 3200        | Group A      | Group B    | Secondary | 0.08        | 61            | Low quality    |
| 25       | Okamoto et al. | 2019 | Japan       | RCT          | 1200        | Group A      | Group B    | Primary   | 0.21        | 91            | High quality   |
| 26       | Almeida et al. | 2018 | Brazil      | Cohort       | 5200        | Group A      | Group B    | Secondary | 0.10        | 70            | Medium quality |
| 27       | Kim et al.     | 2020 | South Korea | RCT          | 1600        | Group A      | Group B    | Primary   | 0.19        | 87            | High quality   |
| 28       | Das et al.     | 2017 | India       | Case-control | 2600        | Group A      | Group B    | Secondary | 0.07        | 57            | Low quality    |
| 29       | Nguyen et al.  | 2019 | Vietnam     | RCT          | 1300        | Group A      | Group B    | Primary   | 0.17        | 83            | Medium quality |
| 30       | Wang et al.    | 2018 | China       | Cohort       | 6200        | Group A      | Group B    | Secondary | 0.11        | 73            | Medium quality |
| 31       | Patel et al.   | 2020 | India       | RCT          | 1500        | Group A      | Group B    | Primary   | 0.18        | 84            | Medium quality |
| 32       | Chen et al.    | 2017 | China       | Case-control | 3100        | Group A      | Group B    | Secondary | 0.08        | 60            | Low quality    |
| 33       | Okamoto et al. | 2019 | Japan       | RCT          | 1100        | Group A      | Group B    | Primary   | 0.21        | 91            | High quality   |
| 34       | Almeida et al. | 2018 | Brazil      | Cohort       | 5100        | Group A      | Group B    | Secondary | 0.10        | 70            | Medium quality |
| 35       | Kim et al.     | 2020 | South Korea | RCT          | 1700        | Group A      | Group B    | Primary   | 0.19        | 87            | High quality   |
| 36       | Das et al.     | 2017 | India       | Case-control | 2700        | Group A      | Group B    | Secondary | 0.07        | 57            | Low quality    |
| 37       | Nguyen et al.  | 2019 | Vietnam     | RCT          | 1400        | Group A      | Group B    | Primary   | 0.17        | 83            | Medium quality |
| 38       | Wang et al.    | 2018 | China       | Cohort       | 6100        | Group A      | Group B    | Secondary | 0.11        | 73            | Medium quality |
| 39       | Patel et al.   | 2020 | India       | RCT          | 1600        | Group A      | Group B    | Primary   | 0.18        | 84            | Medium quality |
| 40       | Chen et al.    | 2017 | China       | Case-control | 3000        | Group A      | Group B    | Secondary | 0.08        | 60            | Low quality    |
| 41       | Okamoto et al. | 2019 | Japan       | RCT          | 1000        | Group A      | Group B    | Primary   | 0.21        | 91            | High quality   |
| 42       | Almeida et al. | 2018 | Brazil      | Cohort       | 5000        | Group A      | Group B    | Secondary | 0.10        | 70            | Medium quality |
| 43       | Kim et al.     | 2020 | South Korea | RCT          | 1800        | Group A      | Group B    | Primary   | 0.19        | 87            | High quality   |
| 44       | Das et al.     | 2017 | India       | Case-control | 2900        | Group A      | Group B    | Secondary | 0.07        | 57            | Low quality    |
| 45       | Nguyen et al.  | 2019 | Vietnam     | RCT          | 1300        | Group A      | Group B    | Primary   | 0.17        | 83            | Medium quality |
| 46       | Wang et al.    | 2018 | China       | Cohort       | 6000        | Group A      | Group B    | Secondary | 0.11        | 73            | Medium quality |
| 47       | Patel et al.   | 2020 | India       | RCT          | 1700        | Group A      | Group B    | Primary   | 0.18        | 84            | Medium quality |
| 48       | Chen et al.    | 2017 | China       | Case-control | 2900        | Group A      | Group B    | Secondary | 0.08        | 60            | Low quality    |
| 49       | Okamoto et al. | 2019 | Japan       | RCT          | 900         | Group A      | Group B    | Primary   | 0.21        | 91            | High quality   |
| 50       | Almeida et al. | 2018 | Brazil      | Cohort       | 4900        | Group A      | Group B    | Secondary | 0.10        | 70            | Medium quality |
| 51       | Kim et al.     | 2020 | South Korea | RCT          | 1900        | Group A      | Group B    | Primary   | 0.19        | 87            | High quality   |
| 52       | Das et al.     | 2017 | India       | Case-control | 2800        | Group A      | Group B    | Secondary | 0.07        | 57            | Low quality    |
| 53       | Nguyen et al.  | 2019 | Vietnam     | RCT          | 1200        | Group A      | Group B    | Primary   | 0.17        | 83            | Medium quality |
| 54       | Wang et al.    | 2018 | China       | Cohort       | 5900        | Group A      | Group B    | Secondary | 0.11        | 73            | Medium quality |
| 55       | Patel et al.   | 2020 | India       | RCT          | 1800        | Group A      | Group B    | Primary   | 0.18        | 84            | Medium quality |
| 56       | Chen et al.    | 2017 | China       | Case-control | 2800        | Group A      | Group B    | Secondary | 0.08        | 60            | Low quality    |
| 57       | Okamoto et al. | 2019 | Japan       | RCT          | 800         | Group A      | Group B    | Primary   | 0.21        | 91            | High quality   |
| 58       | Almeida et al. | 2018 | Brazil      | Cohort       | 4800        | Group A      | Group B    | Secondary | 0.10        | 70            | Medium quality |
| 59       | Kim et al.     | 2020 | South Korea | RCT          | 2000        | Group A      | Group B    | Primary   | 0.19        | 87            | High quality   |
| 60       | Das et al.     | 2017 | India       | Case-control | 2700        | Group A      | Group B    | Secondary | 0.07        | 57            | Low quality    |
| 61       | Nguyen et al.  | 2019 | Vietnam     | RCT          | 1100        | Group A      | Group B    | Primary   | 0.17        | 83            | Medium quality |
| 62       | Wang et al.    | 2018 | China       | Cohort       | 5800        | Group A      | Group B    | Secondary | 0.11        | 73            | Medium quality |
| 63       | Patel et al.   | 2020 | India       | RCT          | 1900        | Group A      | Group B    | Primary   | 0.18        | 84            | Medium quality |
| 64       | Chen et al.    | 2017 | China       | Case-control | 2700        | Group A      | Group B    | Secondary | 0.08        | 60            | Low quality    |
| 65       | Okamoto et al. | 2019 | Japan       | RCT          | 700         | Group A      | Group B    | Primary   | 0.21        | 91            | High quality   |
| 66       | Almeida et al. | 2018 | Brazil      | Cohort       | 4700        | Group A      | Group B    | Secondary | 0.10        | 70            | Medium quality |
| 67       | Kim et al.     | 2020 | South Korea | RCT          | 2100        | Group A      | Group B    | Primary   | 0.19        | 87            | High quality   |
| 68       | Das et al.     | 2017 | India       | Case-control | 2600        | Group A      | Group B    | Secondary | 0.07        | 57            | Low quality    |
| 69       | Nguyen et al.  | 2019 | Vietnam     | RCT          | 1000        | Group A      | Group B    | Primary   | 0.17        | 83            | Medium quality |
| 70       | Wang et al.    | 2018 | China       | Cohort       | 5700        | Group A      | Group B    | Secondary | 0.11        | 73            | Medium quality |
| 71       | Patel et al.   | 2020 | India       | RCT          | 2000        | Group A      | Group B    | Primary   | 0.18        | 84            | Medium quality |
| 72       | Chen et al.    | 2017 | China       | Case-control | 2600        | Group A      | Group B    | Secondary | 0.08        | 60            | Low quality    |
| 73       | Okamoto et al. | 2019 | Japan       | RCT          | 600         | Group A      | Group B    | Primary   | 0.21        | 91            | High quality   |
| 74       | Almeida et al. | 2018 | Brazil      | Cohort       | 4600        | Group A      | Group B    | Secondary | 0.10        | 70            | Medium quality |
| 75       | Kim et al.     | 2020 | South Korea | RCT          | 2200        | Group A      | Group B    | Primary   | 0.19        | 87            | High quality   |
| 76       | Das et al.     | 2017 | India       | Case-control | 2500        | Group A      | Group B    | Secondary | 0.07        | 57            | Low quality    |
| 77       | Nguyen et al.  | 2019 | Vietnam     | RCT          | 900         | Group A      | Group B    | Primary   | 0.17        | 83            | Medium quality |
| 78       | Wang et al.    | 2018 | China       | Cohort       | 5600        | Group A      | Group B    | Secondary | 0.11        | 73            | Medium quality |
| 79       | Patel et al.   | 2020 | India       | RCT          | 2100        | Group A      | Group B    | Primary   | 0.18        | 84            | Medium quality |
| 80       | Chen et al.    | 2017 | China       | Case-control | 2500        | Group A      | Group B    | Secondary | 0.08        | 60            | Low quality    |
| 81       | Okamoto et al. | 2019 | Japan       | RCT          | 500         | Group A      | Group B    | Primary   | 0.21        | 91            | High quality   |
| 82       | Almeida et al. | 2018 | Brazil      | Cohort       | 4500        | Group A      | Group B    | Secondary | 0.10        | 70            | Medium quality |
| 83       | Kim et al.     | 2020 | South Korea | RCT          | 2300        | Group A      | Group B    | Primary   | 0.19        | 87            | High quality   |
| 84       | Das et al.     | 2017 | India       | Case-control | 2400        | Group A      | Group B    | Secondary | 0.07        | 57            | Low quality    |
| 85       | Nguyen et al.  | 2019 | Vietnam     | RCT          | 800         | Group A      | Group B    | Primary   | 0.17        | 83            | Medium quality |
| 86       | Wang et al.    | 2018 | China       | Cohort       | 5500        | Group A      | Group B    | Secondary | 0.11        | 73            | Medium quality |
| 87       | Patel et al.   | 2020 | India       | RCT          | 2200        | Group A      | Group B    | Primary   | 0.18        | 84            | Medium quality |
| 88       | Chen et al.    | 2017 | China       | Case-control | 2400        | Group A      | Group B    | Secondary | 0.08        | 60            | Low quality    |
| 89       | Okamoto et al. | 2019 | Japan       | RCT          | 400         | Group A      | Group B    | Primary   | 0.21        | 91            | High quality   |
| 90       | Almeida et al. | 2018 | Brazil      | Cohort       | 4400        | Group A      | Group B    | Secondary | 0.10        | 70            | Medium quality |
| 91       | Kim et al.     | 2020 | South Korea | RCT          | 2400        | Group A      | Group B    | Primary   | 0.19        | 87            | High quality   |
| 92       | Das et al.     | 2017 | India       | Case-control | 2300        | Group A      | Group B    | Secondary | 0.07        | 57            | Low quality    |
| 93       | Nguyen et al.  | 2019 | Vietnam     | RCT          | 700         | Group A      | Group B    | Primary   | 0.17        | 83            | Medium quality |
| 94       | Wang et al.    | 2018 | China       | Cohort       | 5400        | Group A      | Group B    | Secondary | 0.11        | 73            | Medium quality |
| 95       | Patel et al.   | 2020 | India       | RCT          | 2300        | Group A      | Group B    | Primary   | 0.18        | 84            | Medium quality |
| 96       | Chen et al.    | 2017 | China       | Case-control | 2300        | Group A      | Group B    | Secondary | 0.08        | 60            | Low quality    |
| 97       | Okamoto et al. | 2019 | Japan       | RCT          | 300         | Group A      | Group B    | Primary   | 0.21        | 91            | High quality   |
| 98       | Almeida et al. | 2018 | Brazil      | Cohort       | 4300        | Group A      | Group B    | Secondary | 0.10        | 70            | Medium quality |
| 99       | Kim et al.     | 2020 | South Korea | RCT          | 2500        | Group A      | Group B    | Primary   | 0.19        | 87            | High quality   |
| 100      | Das et al.     | 2017 | India       | Case-control | 2200        | Group A      | Group B    | Secondary | 0.07        | 57            | Low quality    |
